1 Title

2

3 Quantification of autism recurrence risk by direct assessment of paternal sperm mosaicism

4

5 Authors

6

7 Martin W. Breuss<sup>1,2</sup>, Morgan Kleiber<sup>3,4,5</sup>, Renee D. George<sup>1,2</sup>, Danny Antaki<sup>3,4,5</sup>, Kiely N.

8 James<sup>1,2</sup>, Laurel L. Ball<sup>1,2</sup>, Oanh Hong<sup>3,4,5</sup>, Camila A. B. Garcia<sup>1,2</sup>, Damir Musaev<sup>1,2</sup>, An

9 Nguyen<sup>1,2</sup>, Jennifer McEvoy-Venneri<sup>1,2</sup>, Renatta Knox<sup>1,2,6</sup>, Evan Sticca<sup>1,2</sup>, Orrin Devinsky<sup>7</sup>,

10 Melissa Gymrek<sup>8,9</sup>, Jonathan Sebat<sup>3,4,5</sup>, Joseph G. Gleeson<sup>1,2</sup>

11

12 <sup>1</sup>Department of Neurosciences, Howard Hughes Medical Institute, University of California, San

13 Diego, La Jolla, CA 92093, USA

14 <sup>2</sup>Rady Children's Institute for Genomic Medicine, San Diego, CA 92025, USA

15 <sup>3</sup>Beyster Center for Genomics of Psychiatric Diseases, University of California, San Diego, La

16 Jolla, CA 92093, USA

17 <sup>4</sup>Department of Psychiatry, University of California, San Diego, La Jolla, CA 92093, USA

18 <sup>5</sup>Department of Cellular and Molecular Medicine, University of California, San Diego, La Jolla,

19 CA 92093, USA

20 <sup>6</sup>Department of Child Neurology, Weill Cornell Medical College, New York, NY 10065, USA

21 <sup>7</sup>Department of Neurology, Epilepsy Division, New York University School of Medicine, New

22 York, NY 10016, USA

23 <sup>8</sup>Department of Medicine, University of California San Diego, La Jolla, CA 92093, USA

24 <sup>9</sup>Department of Computer Science and Engineering, University of California San Diego, La

25 Jolla, CA 92093, USA

26

27 Correspondence to [jogleeson@ucsd.edu](mailto:jogleeson@ucsd.edu) and [jsebat@ucsd.edu](mailto:jsebat@ucsd.edu)

28

29 Summary

30

31 *De novo* genetic mutations represent a major contributor to pediatric disease, including autism  
32 spectrum disorders (ASD), congenital heart disease, and muscular dystrophies<sup>1,2</sup>, but there are  
33 currently no methods to prevent or predict them. These mutations are classically thought to occur  
34 either at low levels in progenitor cells or at the time of fertilization<sup>1,3</sup> and are often assigned a  
35 low risk of recurrence in siblings<sup>4,5</sup>. Here, we directly assess the presence of *de novo* mutations  
36 in paternal sperm and discover abundant, germline-restricted mosaicism. From a cohort of ASD  
37 cases, employing single molecule genotyping, we found that four out of 14 fathers were germline  
38 mosaic for a putatively causative mutation transmitted to the affected child. Three of these were  
39 enriched or exclusively present in sperm at high allelic fractions (AF; 7-15%); and one was  
40 recurrently transmitted to two additional affected children, representing clinically actionable  
41 information. Germline mosaicism was further assessed by deep (>90x) whole genome  
42 sequencing of four paternal sperm samples, which detected 12/355 transmitted *de novo* single  
43 nucleotide variants that were mosaic above 2% AF, and more than two dozen additional, non-  
44 transmitted mosaic variants in paternal sperm. Our results demonstrate that germline mosaicism  
45 is an underestimated phenomenon, which has important implications for clinical practice and in  
46 understanding the basis of human disease. Genetic analysis of sperm can assess individualized  
47 recurrence risk following the birth of a child with a *de novo* disease, as well as the risk in any  
48 male planning to have children.

49

50 Main Text

51

52 A newborn child harbors, on average, 40-80 *de novo* single nucleotide variants (dSNVs) across  
53 the genome<sup>1,3</sup>, which have the potential to influence health of the child and impact biological  
54 fitness<sup>6</sup>. Consequently, severe early-onset conditions, such as congenital heart disease, epilepsy,  
55 or intellectual disabilities are enriched for *de novo* mutations that activate or inactivate critical  
56 genes<sup>7</sup>. Although this applies broadly to autism spectrum disorders (ASD), high impact dSNVs  
57 are concentrated among a subset of cases with low IQ<sup>8</sup>.

58 The majority of *de novo* mutations originate in the parental germline<sup>9-11</sup>. Depending on the  
59 timing and location of the mutation, these may be mosaic throughout the body or only in the  
60 parental germline, and they could transmit to multiple offspring. Indeed, this has been  
61 documented in families with recurrent *de novo* mutations as well as in recent studies that  
62 assessed parental mosaicism<sup>1,9,10</sup>. Two crucial questions, however, remain unaddressed: What is  
63 the extent of mosaicism in the parental germline? Can quantification of mosaicism help to  
64 estimate risk of recurrence in the parents?

65 We propose three main hypotheses: 1) a subset of dSNVs originate from early mutational events  
66 and can be detected as mosaic in the germ cell population; 2) due to the early separation of the  
67 germline during embryogenesis, these dSNVs are either absent or underrepresented in peripheral  
68 tissues; and 3) by assessing germ cells directly, prediction of the recurrence risk of a given  
69 mutation may be accurately assessed.

70 Because a majority of dSNVs are paternal in origin<sup>9,11</sup>, and because germline allele frequencies  
71 can be quantified directly from sperm-derived DNA, we focused on the profiling of germline  
72 mosaicism in fathers of children affected with ASD. We accessed genetic data from two

73 independent ASD cohorts: one focusing on 98 probands with ASD and an additional diagnosis of  
74 epilepsy (O.D. and J.G.G; unpublished), and one consisting of 71 probands with general features  
75 of ASD (J.S.)<sup>12</sup>. For both, candidate dSNVs were identified through unbiased trio *de novo*  
76 sequencing<sup>8,13</sup>. Twelve families met criteria, where a likely pathogenic mutation was identified,  
77 and where participants agreed to provide semen samples (Fig. 1a and Supplementary Table 1).  
78 We used single molecule droplet digital PCR (ddPCR) genotyping for quantitative analysis of  
79 mosaicism, with a detection limit of 0.1% allelic fraction (AF) (Fig. 1a).  
80 Of the 12 samples, three harbored mosaic variants in father's sperm (Fig. 1b, Extended Data Fig.  
81 1a-c and 2a-c), two of which showed clinically significant AF of 14.47% (F01) and 8.09% (F05).  
82 This contrasts with the *a priori* risk in the general population of 1:68 (i.e. ~1.5%) for ASD,  
83 suggesting a 5-10 fold elevated risk for these males of fathering a subsequent child with the same  
84 mutation. Strikingly, the matched blood or saliva exhibited either a drastically lower fractional  
85 abundance (1.19%, F01) or were below the detection limit of our assay (<0.1%, F05) (Fig. 1f and  
86 Extended Data Fig. 2b). The variant found in F02 showed similar mosaicism in sperm (0.56%)  
87 and saliva (1.16%) (Extended Data Fig. 2a). However, low sperm counts and amount of  
88 recovered DNA may render this sample sensitive to artifacts (e.g. somatic tissue contamination  
89 or biased sampling of a small subpopulation of cells).  
90 Our original trio-analysis of F01 only included one affected child (II-3), harboring a *de novo*  
91 mutation in *GRIN2A*, a cause of diverse neurodevelopmental conditions (Fig. 1c,d)<sup>14,15</sup>.  
92 Following disclosure of the mosaic germline variant, the parents reported that both older children  
93 displayed neurological phenotypes consistent with this mutation (Fig. 1c and Supplementary  
94 Table 2)<sup>14,15</sup>. Indeed, we found that both carried the same heterozygous, pathogenic variant that  
95 was detected in the proband and mosaic in the father (Fig. 1e,f and Extended Data Fig. 1d),

96 although the expressivity in this family argued against a single genetic cause (Supplementary  
97 Table 2). (Only the epilepsy, but not ASD was expressed in all children. The youngest sibling  
98 met criteria for ASD, whereas the middle child showed features of ADHD and speech  
99 impairment; the oldest sibling had ADHD, which resolved in adolescence.) This initial analysis  
100 of a limited ASD cohort confirmed our three hypotheses and argued that paternal sperm can  
101 provide useful material for genetic assessment, which can impact diagnosis and discussions of  
102 recurrence risks.

103 Having assessed only a single variant in each family, we were not able to draw conclusions  
104 regarding the full extent of germline mosaicism. Therefore, we additionally performed whole  
105 genome sequencing (WGS) of matched sperm and blood samples at >90x read depth from four  
106 fathers (F08, F09, F21, and F22) (Extended Data Fig. 3a,b). We first assessed paternal sperm  
107 mosaicism for 355 high-confidence dSNVs detected in their six children (denoted ‘all’, Fig. 2a).  
108 We confirmed that the number per offspring increased as a function of the paternal age at  
109 conception ( $R^2=0.804$ ,  $P=0.015$ ) (Fig. 2b). This was consistent with previous reports and  
110 provided evidence that these dSNVs represented biologically relevant mutational events<sup>9,11</sup>.

111 From these, 152 variants were phased to the paternal haplotype (denoted ‘pat’, Fig. 2a) and also  
112 showed the expected positive correlation with paternal age ( $R^2=0.939$ ,  $P=0.031$ ) (Fig. 2b).  
113 In the paternal WGS data, 16.62% (all) and 19.08% (pat) of these dSNVs were detected in the  
114 father, the majority being exclusively present in sperm, or enriched in sperm relative to blood  
115 (Fig. 2c and Supplementary Table 3). Most variants were present at AF below 2% and were  
116 uniformly distributed across chromosomes (Fig. 2d,e and Extended Data Fig. 4a-d,g). Neither the  
117 number of mosaic dSNVs, nor the average AF were significantly correlated with the paternal age  
118 at conception (Extended Data Fig. 4e,f).

119 Orthogonal validation by Sanger sequencing and ddPCR confirmed germline presence of most  
120 variants with AF above 2% (5/6 by Sanger sequencing), but not those below this threshold (0/6  
121 by ddPCR) (Fig. 2f and Extended Data Fig. 5). Based on this and the baseline risk of ASD in the  
122 general population of ~1.5%, we used 2% as the threshold for clinically relevant mosaicism. Of  
123 all dSNVs, 3.38% (all) and 5.92% (pat) exceeded this level (Fig. 2c). These data suggest that, in  
124 the absence of selection acting on the pathogenic mutation, more than 3% of diseases caused by  
125 dSNVs have a risk of recurrence that is substantially elevated when compared to the basal  
126 population-wide risk<sup>16</sup>. Moreover, for the majority of cases this risk cannot be assessed  
127 accurately in somatic tissues, but can be assessed in paternal sperm.

128 We also studied the genome-wide extent of mosaic variation in sperm using the WGS data (Fig.  
129 3a). We identified high-quality sperm-specific mosaic variants using a stringent pipeline that  
130 utilized two mosaic detection algorithms: MuTect and Strelka. We further excluded likely false  
131 calls in repetitive regions or within  $\pm 5$  base pairs of a germline insertion or deletion variant. In  
132 total, we detected 30 mosaic SNVs with AF between 29.8% and 3.7% in the sequenced sperm  
133 from the four fathers (Fig. 3b-e, Extended Data Fig. 6a-d, and Supplementary Table 4). As with  
134 mosaic dSNVs, neither the number of mosaic SNVs, nor their average AF showed correlation  
135 with age at sampling (Extended Data Fig. 6e-f).

136 We likely underestimated the true number of mosaic SNVs, as we could only detect mosaic  
137 variants above 4% AF at current sequencing depth of >90x. Moreover, we only detected the top-  
138 ranked variant (Chr22:23082101A>G in F08) from the pool of 39 mosaic dSNVs (Fig. 2f and  
139 Supplementary Table 4). Future efforts to detect lower frequency, pathogenic variants in sperm  
140 will require improved algorithms for detection, higher sequencing depths, or both. A cost-  
141 effective way to achieve this would be to sequence targeted regions of interest (e.g. the exome,

142 haploinsufficient genes, or candidate genes for sporadic diseases). Nevertheless, the relatively  
143 high frequency of germline mosaicism with variants present at high AF argues for the clinical  
144 utility of screening sperm to identify carriers prior to conception. Furthermore, a complementary  
145 analysis of blood-specific mosaicism suggested a largely distinct set of variants from those  
146 evident in the germ cells (Extended Data Fig. 7). This should be explored further by increasing  
147 the sensitivity of mosaic detection, which would allow for the detailed interrogation of lineage  
148 and mutational rate differences between these tissues<sup>17,18</sup>.

149 Finally, to determine if this approach could be applied to other forms of genetic variation, we  
150 tested germline mosaicism of two structural *de novo* variant classes: 1) large deletions and  
151 duplications, and 2) short tandem repeat (STR) expansions and contractions. F21 and F22 both  
152 harbor likely pathogenic *de novo* structural variants: a ~1.5 Mb duplication (F21) and a 130 kb  
153 deletion (F22) (Fig. 4a)<sup>12</sup>. While the duplication in F21 and a non-pathogenic, additional deletion  
154 in F22 did not appear to be mosaic in sperm (Extended Data Fig. 8d-g), we found evidence of  
155 sperm-specific mosaicism for the pathogenic deletion in F22 using read depth and split-read  
156 information (Extended Data Fig. 8a,b). This was confirmed with a PCR based strategy, and copy  
157 number detection by ddPCR estimated 0.15 deletion copies in paternal sperm, or an effective AF  
158 of ~7.5% given the presence of an unaffected reference allele in the genome (Fig. 4b-d and  
159 Extended Data Fig. 8c).

160 Short tandem repeats (STRs) are particularly dynamic in the genome and can expand or contract  
161 *de novo* during transcription, replication, and meiosis, impacting gene functions and causing  
162 diseases such as Huntington's disease or Fragile X syndrome<sup>19,20</sup>. As *de novo* short tandem  
163 repeat changes (dSTRΔs) have to date not been implicated in ASD, we could not identify likely  
164 pathogenic variants. Therefore, we adopted a strategy similar to the one used to evaluate dSNVs:



165 calling non-pathogenic dSTRΔs using WGS data and then evaluating their presence in paternal  
166 sperm and blood (Fig. 2a and 4e). We detected 86 non-pathogenic dSTRΔs, five of which were  
167 exclusively mosaic in the paternal sperm at an AF ranging from 17.5% to 1.9% (Fig. 4e,  
168 Extended Data Fig. 9a-e, and Supplementary Table 5). The dSTRΔ with the highest AF was a  
169 tetranucleotide repeat expansion in the child (Fig. 4f). It was not present in the somatic tissues of  
170 either parent, but was detected in the father's germline with a 17.5% AF (Fig. 4g and Extended  
171 Data Fig. 9f-g). Highly unstable STR pre-mutations may be prone to early mosaicism. Assessing  
172 dSTRΔs in the germline in pre-mutation carriers may help to adjust the individualized risk to  
173 offspring.

174 This study is the first, to our knowledge, to directly assess this type of mosaicism in a relevant  
175 germline tissue, paternal sperm. While previous reports have estimated germline mosaicism from  
176 dSNV recurrence among siblings or detection in peripheral tissues<sup>9,10,21,22</sup>, here we directly  
177 measure germline mosaicism in males and present a conceptual framework for refining disease  
178 risk to offspring. We show that more than 3% of dSNVs are mosaic in the paternal germline.  
179 Although we focus on families with ASD, these findings are applicable to a range of diseases  
180 caused by *de novo* mutations. The analysis of sperm instead of non-germline tissues could be an  
181 important addition to clinical practice allowing for accurate prediction of recurrence risk, but  
182 also for detection of previously non-transmitted, mosaic mutations prior to conception.

183

184 Methods

185

186 **Patient recruitment.** Patients were enrolled according to approved human subjects protocols at  
187 the University of California for blood, saliva, and semen sampling. Semen was collected for all  
188 fathers of families F01-12 and F21-22. For F01-04 we obtained saliva from the fathers and their  
189 family members, for F05-12 and F21-22 we extracted DNA from blood. WES trio analysis for  
190 F01-F04 was performed on DNA extracted from lymphocyte cell lines (generated by the NIMH  
191 Repository) and results were confirmed in saliva samples, WGS trio analysis for F04-12 and  
192 F21-22 was performed on DNA derived from blood.

193

194 **WES and WGS trio analysis.** Exome capture and sequencing of F01-F04 was performed at the  
195 New York Genome Center (Agilent Human All Exon 50 Mb kit, Illumina HiSeq 2000, paired-  
196 end: 2x100) and the Broad Institute (Agilent Sure-Select Human All Exon v2.0, 44Mb baited  
197 target, Illumina HiSeq 2000, paired-end:2x76). Sequencing reads were aligned to hg19 reference  
198 using BWA (v0.7.8)<sup>23</sup>. Duplicates were marked using Picard's MarkDuplicates (v1.83,  
199 <http://broadinstitute.github.io/picard>) and reads were re-aligned around INDELs with GATK's  
200 IndelRealigner<sup>24</sup>. Variant calling for SNVs and INDELs was according to GATK's best practices  
201 by first calling variants in each sample with HaplotypeCaller and jointly genotyping them across  
202 the entire cohort using CombineGVCFs and GenotypeGVCFs. Variants were annotated with  
203 SnpEff (v4.2)<sup>25</sup> and SnpSift (v4.2)<sup>26</sup> and allele frequencies from the 1000 Genomes Project and  
204 the Exome Aggregation Consortium (ExAC)<sup>27,28</sup>. *De novo* variants were called for probands  
205 using Triodenovo<sup>29</sup> with a minimum *de novo* quality score (minDQ) of 2.0 and subjected to

206 manual inspection. WGS sequencing and analysis for F05-F12 and F21-22 were performed as  
207 described previously<sup>3,12</sup>.

208

209 **Blood and saliva extraction.** DNA was extracted on an Autopure LS instrument (Qiagen,  
210 Valencia, CA).

211

212 **Sperm extraction.** Extraction of sperm cell DNA from fresh ejaculates was performed as  
213 previously described<sup>30</sup>. In short, sperm cells were isolated by centrifugation of the fresh ejaculate  
214 over an isotonic solution (90%) (Sage/Origio, ART-2100; Sage/Origio, ART-1006) using up to 2  
215 mL of the sample. Following a washing step, quantity and quality were assessed using a cell  
216 counting chamber (Sigma-Aldrich, BR717805-1EA). Cells were pelleted and lysis was  
217 performed by addition of RLT lysis buffer (Qiagen, 79216), Bond-Breaker TCEP solution  
218 (Pierce, 77720), and 0.2 mm stainless steel beads (Next Advance, SSB02) on a Disruptor Genie  
219 (Scientific Industries, SI-238I). The lysate was processed using reagents and columns from an  
220 AllPrep DNA/RNA Mini Kit (Qiagen, 80204). Concentration of the final eluate was assessed  
221 employing standard methods. Concentrations ranged from ~0.5-300 ng/ $\mu$ l. Sperm extracted DNA  
222 was stored on -20°C.

223

224 **Sanger sequencing of SNVs.** PCR and Sanger sequencing were performed according to  
225 standard methods. Primer sequences can be found in Supplementary Table 6. Validated  
226 mutations and surrounding SNPs were also used as basis for the design of ddPCR assays where  
227 applicable.

228

229 **ddPCR design, validation, and setup of experiments.** Using the Primer3Plus web interface<sup>31-</sup>  
230 <sup>33</sup>, the amplicon and probes for wild-type and mutant were designed to distinguish reference and  
231 alternate allele (settings in Supplementary Document 1). Probes were required to be located  
232 within 15bp up- and 15 bp downstream of the mutation and adjusted, so melting temperatures  
233 (T<sub>m</sub>) were matched between reference and alternate probe. In addition, if possible, amplicons  
234 were kept at 100 bp or shorter and probes at 20 bp or shorter. Specificity of the primers was  
235 assessed using Primer-BLAST<sup>34</sup>. Custom primer and probe mixes (primer to probe ratio of 3.6)  
236 were ordered from IDT with FAM-labeled probes for the alternate, and HEX-labeled probes for  
237 the reference allele (Supplementary Table 6). Optimal annealing temperature, specificity, and  
238 efficiency were tested using custom gblocks (IDT) or patient DNA at a range of dilutions.  
239 ddPCR was performed on a BioRad platform, using a QX200 droplet generator, a C1000 touch  
240 cycler, a PX1 PCR Plate Sealer, and a QX200 droplet reader with the following reagents: ddPCR  
241 Supermix (BioRad, 1863024), droplet generation oil (BioRad, 1863005), cartridge (BioRad,  
242 1864008), and PCR plates (Eppendorf, 951020346). Aiming for 30-60 ng per reaction, up to 8 µl  
243 of DNA solution were used in a single reaction. Data analysis was performed using the software  
244 packages QuantaSoft and QuantaSoft Analysis Pro (BioRad). Each run included technical  
245 triplicates. For direct comparison of sperm samples we used seven technical replicates, except  
246 for F01, where the total amount of sperm DNA was limiting. Across all ddPCR reactions that  
247 were designed for SNV detection, we determined that the minimum AF that we could reliably  
248 detect was 0.1%. Therefore, we set this as threshold of detection. Raw data for ddPCR  
249 experiments can be found in Supplementary Table 7.

250

251 **Data processing.** Graphs were generated and data analyzed using GraphPad Prism, R, and  
252 Python (matplotlib library).  
253  
254 **WGS of matched sperm and blood samples.** WGS was performed using an Illumina TrueSeq  
255 PCR-free kit (350bp insertion) on an Illumina HiSeqX. Paired-end FASTQ files of deeply  
256 (>90x) sequenced blood and sperm samples from fathers were aligned to the hg19 reference  
257 genome (1000Genomes version 37) with bwa mem (version 0.7.15-r1140), specifying the -M  
258 option that tags chimeric reads as secondary, required for some downstream applications that  
259 implement this legacy option. The resulting average coverage was 117x for blood samples and  
260 109x for sperm samples with an average read length of 150bp for both sets. Duplicates were  
261 removed with the markdup command from sambamba (version 0.6.6), and base quality scores  
262 were recalibrated with the Genome Analysis ToolKit (GATK version 3.5-0-g36282e4). SNPs  
263 and INDELs were called with HaplotypeCaller jointly genotyping within pedigrees, consisting of  
264 the deep coverage (>90x) genomes from father's blood and sperm and 40x coverage genomes  
265 derived from blood of the parents, sibling (F08 and F21 only), and proband.  
266  
267 **Oxford Nanopore sequencing and analysis.** We generated whole genome sequencing libraries  
268 with Oxford Nanopore 1D long reads for four affected probands (Families: F08, F09, F21, and  
269 F22) according to manufacturer's recommendations. FASTQs were aligned to the hg19 reference  
270 genome with bwa mem with the '-x ont2d' option for ONP reads. Coverage of proband samples  
271 ranged from 15x to 3x (average 9x) with average read length ranging from 7,839bp to 4,645bp  
272 (average: 6,777bp).  
273

274 **Haplotype phasing.** To determine dSNV phase, we first identified a set of phase-informative  
275 SNPs using the germline variant calls from our 40x WGS data. Phase-informative SNPs were  
276 those where the child was heterozygous and either 1) one parent was heterozygous or  
277 homozygous for the alternate allele while the other parent was homozygous for the reference  
278 allele, or 2) one parent was heterozygous while the other parent was homozygous for the  
279 alternate allele. Second, we identified long-reads (Oxford Nanopore reads, average length 6,777  
280 bp) that contained both a dSNV and one or more phase-informative SNPs. We then counted the  
281 number of dSNV and phase-informative SNP combinations that were present in reads and  
282 consistent with the dSNV occurring on a maternal or paternal haplotype. Reads containing an  
283 INDEL flanking either the dSNV or the phase-informative SNP were excluded from the analysis.  
284 Finally, we assigned the dSNVs to maternal and paternal haplotypes if there were: 1) a minimum  
285 of two counts, and 2) the haplotype with the majority of counts had at least 2/3 of total counts.  
286 Out of the 256 variants from the four affected children, we succeeded in phasing for 187  
287 (73.0%), of which 152 were phased to the paternal haplotype (81.3%;  $\alpha \sim 4$ ). These paternal  
288 dSNVs were then used for further analysis as described below.

289  
290 **Mosaic dSNV analysis.** Using the read information generated by HaplotypeCaller, we  
291 determined AF for previously called dSNVs. We additionally annotated dSNVs that fell in  
292 repetitive regions of the human genome using the repeatMasker (rmsk.txt) file from UCSC. We  
293 manually filtered those variants that were homozygous in the reference and heterozygous in the  
294 proband, as well as variants that were present in both blood and sperm at AF that suggested an  
295 inherited heterozygous SNP (i.e. AF > 35% in both blood and sperm). This resulted in a total of  
296 355 dSNVs that were analyzed, 152 being paternally phased (see phasing methods). Out of 355

297 variants, 169 were outside of repetitive regions. Separate analysis of these, revealed similar rates  
298 of mosaicism (Supplementary Table 3). Thus, we concluded that assessment of all variants is  
299 acceptable for this approach. Out of the total of 355, 59 (all) and 12 (AF>2%) were showing read  
300 evidence in sperm, blood, or both. 7 (all) and 2 (AF>2%) of these were phased to the maternal  
301 haplotype (i.e. were most likely false positives). Out of the paternally phased 152 variants, 29  
302 (all) and 9 (AF>2%) were showing read evidence in sperm, blood, or both. Mosaic variants were  
303 categorized based on their presence or absence in sperm and blood. To be called sperm enriched,  
304 a variant's AF had to be three times higher in sperm than in blood ( $\alpha > 3$ ).

305  
306 **MuTect/Strelka mosaic variant calling.** Sequencing reads for four pairs of blood and sperm  
307 samples were aligned to the hg19 version of the reference genome using the iSAAC aligner<sup>35</sup>  
308 using the option `--base_quality_cutoff 15`. Duplicates were marked with Picard's  
309 MarkDuplicates (v1.128, <http://broadinstitute.github.io/picard>) and INDELS were realigned  
310 using GATK's IndelRealigner (v3.5)<sup>24</sup>. We then called sperm- and blood-specific SNVs using  
311 two somatic variant callers with default parameters, Strelka (v2.7.0)<sup>36</sup> and muTect (v3.1)<sup>37</sup>,  
312 setting the sperm sample as "tumor" and the blood sample as "normal". For blood specific-  
313 variants, we did the reverse. We defined a high threshold for somatic calls for each sperm-blood  
314 and blood-sperm comparison by taking the intersection of variants identified by both Strelka and  
315 MuTect. These high quality calls were further filtered to reduce potential false positives as  
316 follows. We removed calls that fell into repetitive regions, using the RepeatMasker (rmsk.txt)  
317 file from UCSC, and removed calls that fell within 5 bp of a germline INDEL. For mosaic  
318 variant analysis in blood, F09 was an outlier with respect to number of variants that were called.

319 Consequently, analyses were performed with and without variants from this individual to reflect  
320 this issue.

321  
322 **Mosaic SV analysis of WGS data.** We searched for evidence for mosaicism in the fathers using  
323 depth of coverage, split-reads, discordant paired-ends, and B-allele frequency in deeply  
324 sequenced paired-end genomes. Depth of coverage was estimated as the median per base-pair  
325 coverage within the SV locus, while omitting positions that overlapped assembly gaps,  
326 RepeatMasker elements, short tandem repeats, and segmental duplications. We estimated copy  
327 number by dividing the median depth of coverage by the median coverage of the chromosome  
328 and multiplying by 2. Split-reads (also known as chimeric reads) are those with multiple  
329 alignments to the genome. If a read spanned a deletion or tandem duplication breakpoint, two  
330 alignments were generated with each segment mapping to opposite ends of the breakpoint.  
331 Similar to split-reads, discordant paired-ends had read fragments that span the SV breakpoint,  
332 but the SV breakpoint resided in the unsequenced insert of the fragment. Consequently, the  
333 paired-ends mapped to opposite ends of the breakpoint producing an insert size approaching the  
334 size of the SV. We searched  $\pm 250$  bp from the predicted breakpoint for SV supporting reads,  
335 which were unique reads that were either split or contained discordant paired-ends with  
336 breakpoints that overlap at least 95% reciprocally to the SV. We reported the proportion of  
337 supporting reads to non-informative reads (those that do not support the SV) within the  $\pm 250$ bp  
338 windows, which roughly estimates proportion of mosaicism. Additionally for the *de novo*  
339 duplication SV, we searched for deviations in B-allele frequency defined as the proportion of  
340 reads that support the alternate variant to all reads covering the variant in question.

341



342 **Mosaic SV analysis using PCR and ddPCR.** Nested PCR was performed using blood DNA  
343 extracted from the F22 trio (proband, mother, and father), as well as sperm from the F22 father  
344 and a non-related male. Primers were designed using Primer3Plus online software<sup>31</sup> to span the  
345 deletion breakpoints within *CACNG2* determined by WGS analysis within 500 bp windows up-  
346 and down-stream of the predicted deletion. Additionally, a reverse primer was designed to be  
347 used with the nested forward primer as an amplification control (Supplementary Table 6). All  
348 PCR reactions were 25  $\mu$ l volumes and included 20 mM Tris-HCl (pH 8.4), 50 mM KCl, 2 mM  
349 MgCl<sub>2</sub>, 1 U of Taq (Thermo Fisher Scientific, Waltham, MA), and 300 nM of each appropriate  
350 primer. DNA template was 50 ng of DNA from blood or sperm for the initial PCR (using the  
351 external set of primers), or 1  $\mu$ l of the initial PCR product for the nested (internal) PCR. PCR  
352 reactions were run following a standard ramp speed protocol using a C1000 Touch™ Thermal  
353 Cycler (Bio Rad, Hercules, CA) with cycling consisting of a 2 min initiation at 95°C, 35 cycles  
354 of 95°C for 30 s, 55°C anneal for 30 s, and 72°C for 1 min, followed by a final extension at 72°C  
355 for 3 min. Products were resolved on 2% agarose gels. For ddPCR analysis, primer and probe  
356 sets for F22 were designed using Primer3Plus (Supplementary Document 1 and Supplementary  
357 Table 6). Probe annealing temperature was designed to be 5°C higher than the primer binding  
358 temperatures. Primers were designed to span the deletion breakpoints within *CACNG2*. A custom  
359 primer and FAM-labeled probe mix at a primer:probe ratio of 750 nM:250 nM was ordered from  
360 Bio Rad (Hercules, CA) as well as a HEX-labeled pre-validated copy number variation assay  
361 specific for *RPP30* as an internal control (assay ID: dHsaCP2500350). ddPCR was performed  
362 and analyzed as described above. Raw data for ddPCR experiments can be found in  
363 Supplementary Table 8.  
364

365 **dSTRA calling and mosaicism detection.** For the analysis of STR expansions and contractions,  
366 we used HipSTR<sup>38</sup> (version v0.2-311-g9bcd580) jointly on all BAM files (40x trios and >90x  
367 blood and sperm of fathers). We used the reference STR set provided by HipSTR for GRCh37  
368 (GRCh37.hipstr\_reference.bed) and default options except for: --def-stutter-model and --output-  
369 gls. We further ran HipSTR's denovofinder tool on each of the 40x trios with the option --  
370 uniform-prior. The following, strict filters were applied for the detection of a *de novo*: required  
371 genotype call in all family members; posterior probability of de novo mutation  $\geq 0.9$ ; ignored  
372 mutations that are not a multiple of the repeat unit; ignored if allele lengths followed Mendelian  
373 inheritance or if *de novo* allele also was found in one of the parents; minimum genotype quality  
374 of 0.9 in all family members; minimum percentage of reads with stutter or INDEL was 20% for  
375 all family members; required at least 10 spanning reads in all family members; required at least  
376 20% of reads to support each allele in each family member; new allele was excluded if  
377 homozygous in the child; removed segmental duplications (UCSC segmental duplication  
378 track)<sup>39,40</sup>; and removed calls that overlapped with >10 entries in DGV<sup>41</sup>. We then annotated the  
379 remaining loci with their frequencies in the >90x sperm and blood samples. We calculated the  
380 posterior probability of a *de novo* mutation using HipSTR outputs of no mutation, *de novo*  
381 mutation, and other. We converted this to a posterior assuming the following priors:  
382  $\text{prob}(\text{mutation})=0.0001$  and  $\text{prob}(\text{other})=0.01$ . dSTRAs were qualified as inconclusive if  
383 mosaicism was detected in mother and father or only in paternal blood; as true *de novo* if no  
384 mosaicism was detected in the parents; as maternal if mosaicism was only detected in the  
385 mother; and as paternal if mosaicism was detected in blood and sperm, or sperm only.

386

387

388 References (Main Text)

389

- 390 1 Acuna-Hidalgo, R., Veltman, J. A. & Hoischen, A. New insights into the generation and role of  
391 de novo mutations in health and disease. *Genome Biol* **17**, 241, doi:10.1186/s13059-016-1110-1 (2016).
- 392 2 Veltman, J. A. & Brunner, H. G. De novo mutations in human genetic disease. *Nat Rev Genet* **13**,  
393 565-575, doi:10.1038/nrg3241 (2012).
- 394 3 Michaelson, J. J. *et al.* Whole-genome sequencing in autism identifies hot spots for de novo  
395 germline mutation. *Cell* **151**, 1431-1442, doi:10.1016/j.cell.2012.11.019 (2012).
- 396 4 Campbell, I. M. *et al.* Parent of origin, mosaicism, and recurrence risk: probabilistic modeling  
397 explains the broken symmetry of transmission genetics. *Am. J. Hum. Genet.* **95**, 345-359,  
398 doi:10.1016/j.ajhg.2014.08.010 (2014).
- 399 5 Rothlisberger, B. & Kotzot, D. Recurrence risk in de novo structural chromosomal  
400 rearrangements. *Am J Med Genet A* **143A**, 1708-1714, doi:10.1002/ajmg.a.31826 (2007).
- 401 6 Vissers, L. E. *et al.* A de novo paradigm for mental retardation. *Nat. Genet.* **42**, 1109-1112,  
402 doi:10.1038/ng.712 (2010).
- 403 7 Huang, N., Lee, I., Marcotte, E. M. & Hurles, M. E. Characterising and predicting  
404 haploinsufficiency in the human genome. *PLoS Genet.* **6**, e1001154, doi:10.1371/journal.pgen.1001154  
405 (2010).
- 406 8 Iossifov, I. *et al.* The contribution of de novo coding mutations to autism spectrum disorder.  
407 *Nature* **515**, 216-221, doi:10.1038/nature13908 (2014).
- 408 9 Rahbari, R. *et al.* Timing, rates and spectra of human germline mutation. *Nat. Genet.* **48**, 126-133,  
409 doi:10.1038/ng.3469 (2016).
- 410 10 Krupp, D. R. *et al.* Exonic mosaic mutations contribute risk for autism spectrum disorder.  
411 *bioRxiv*, doi:10.1101/083428 (2017).
- 412 11 Kong, A. *et al.* Rate of de novo mutations and the importance of father's age to disease risk.  
413 *Nature* **488**, 471-475, doi:10.1038/nature11396 (2012).
- 414 12 Brandler, W. M. *et al.* Frequency and Complexity of De Novo Structural Mutation in Autism.  
415 *Am. J. Hum. Genet.* **98**, 667-679, doi:10.1016/j.ajhg.2016.02.018 (2016).
- 416 13 Neale, B. M. *et al.* Patterns and rates of exonic de novo mutations in autism spectrum disorders.  
417 *Nature* **485**, 242-245, doi:10.1038/nature11011 (2012).
- 418 14 Carvill, G. L. *et al.* GRIN2A mutations cause epilepsy-aphasia spectrum disorders. *Nat. Genet.*  
419 **45**, 1073-1076, doi:10.1038/ng.2727 (2013).
- 420 15 Lemke, J. R. *et al.* Mutations in GRIN2A cause idiopathic focal epilepsy with rolandic spikes.  
421 *Nat. Genet.* **45**, 1067-1072, doi:10.1038/ng.2728 (2013).
- 422 16 Goriely, A. & Wilkie, A. O. Paternal age effect mutations and selfish spermatogonial selection:  
423 causes and consequences for human disease. *Am. J. Hum. Genet.* **90**, 175-200,  
424 doi:10.1016/j.ajhg.2011.12.017 (2012).
- 425 17 Ju, Y. S. *et al.* Somatic mutations reveal asymmetric cellular dynamics in the early human  
426 embryo. *Nature* **543**, 714-718, doi:10.1038/nature21703 (2017).
- 427 18 Behjati, S. *et al.* Genome sequencing of normal cells reveals developmental lineages and  
428 mutational processes. *Nature* **513**, 422-425, doi:10.1038/nature13448 (2014).
- 429 19 Gymrek, M. A genomic view of short tandem repeats. *Curr Opin Genet Dev* **44**, 9-16,  
430 doi:10.1016/j.gde.2017.01.012 (2017).
- 431 20 Lopez Castel, A., Cleary, J. D. & Pearson, C. E. Repeat instability as the basis for human diseases  
432 and as a potential target for therapy. *Nat Rev Mol Cell Biol* **11**, 165-170, doi:10.1038/nrm2854 (2010).
- 433 21 Zillhardt, J. L. *et al.* Mosaic parental germline mutations causing recurrent forms of  
434 malformations of cortical development. *Eur. J. Hum. Genet.* **24**, 611-614, doi:10.1038/ejhg.2015.192  
435 (2016).

436 22 Oegema, R. *et al.* Recognizable cerebellar dysplasia associated with mutations in multiple tubulin  
437 genes. *Hum. Mol. Genet.* **24**, 5313-5325, doi:10.1093/hmg/ddv250 (2015).  
438

## 439 References (Methods)

440  
441 23 Li, H. & Durbin, R. Fast and accurate short read alignment with Burrows-Wheeler transform.  
442 *Bioinformatics* **25**, 1754-1760, doi:10.1093/bioinformatics/btp324 (2009).  
443 24 DePristo, M. A. *et al.* A framework for variation discovery and genotyping using next-generation  
444 DNA sequencing data. *Nat. Genet.* **43**, 491-498, doi:10.1038/ng.806 (2011).  
445 25 Cingolani, P. *et al.* A program for annotating and predicting the effects of single nucleotide  
446 polymorphisms, SnpEff: SNPs in the genome of *Drosophila melanogaster* strain w1118; iso-2; iso-3. *Fly*  
447 (*Austin*) **6**, 80-92, doi:10.4161/fly.19695 (2012).  
448 26 Cingolani, P. *et al.* Using *Drosophila melanogaster* as a Model for Genotoxic Chemical  
449 Mutational Studies with a New Program, SnpSift. *Front Genet* **3**, 35, doi:10.3389/fgene.2012.00035  
450 (2012).  
451 27 Lek, M. *et al.* Analysis of protein-coding genetic variation in 60,706 humans. *Nature* **536**, 285-  
452 291, doi:10.1038/nature19057 (2016).  
453 28 Genomes Project, C. *et al.* A global reference for human genetic variation. *Nature* **526**, 68-74,  
454 doi:10.1038/nature15393 (2015).  
455 29 Wei, Q. *et al.* A Bayesian framework for de novo mutation calling in parents-offspring trios.  
456 *Bioinformatics* **31**, 1375-1381, doi:10.1093/bioinformatics/btu839 (2015).  
457 30 Wu, H., de Gannes, M. K., Luchetti, G. & Pilsner, J. R. Rapid method for the isolation of  
458 mammalian sperm DNA. *Biotechniques* **58**, 293-300, doi:10.2144/000114280 (2015).  
459 31 Untergasser, A. *et al.* Primer3--new capabilities and interfaces. *Nucleic Acids Res.* **40**, e115,  
460 doi:10.1093/nar/gks596 (2012).  
461 32 Untergasser, A. *et al.* Primer3Plus, an enhanced web interface to Primer3. *Nucleic Acids Res.* **35**,  
462 W71-74, doi:10.1093/nar/gkm306 (2007).  
463 33 Koressaar, T. & Remm, M. Enhancements and modifications of primer design program Primer3.  
464 *Bioinformatics* **23**, 1289-1291, doi:10.1093/bioinformatics/btm091 (2007).  
465 34 Ye, J. *et al.* Primer-BLAST: a tool to design target-specific primers for polymerase chain  
466 reaction. *BMC Bioinformatics* **13**, 134, doi:10.1186/1471-2105-13-134 (2012).  
467 35 Raczky, C. *et al.* Isaac: ultra-fast whole-genome secondary analysis on Illumina sequencing  
468 platforms. *Bioinformatics* **29**, 2041-2043, doi:10.1093/bioinformatics/btt314 (2013).  
469 36 Saunders, C. T. *et al.* Strelka: accurate somatic small-variant calling from sequenced tumor-  
470 normal sample pairs. *Bioinformatics* **28**, 1811-1817, doi:10.1093/bioinformatics/bts271 (2012).  
471 37 Cibulskis, K. *et al.* Sensitive detection of somatic point mutations in impure and heterogeneous  
472 cancer samples. *Nat Biotechnol* **31**, 213-219, doi:10.1038/nbt.2514 (2013).  
473 38 Willems, T. *et al.* Genome-wide profiling of heritable and de novo STR variations. *Nat. Methods*  
474 **14**, 590-592, doi:10.1038/nmeth.4267 (2017).  
475 39 Karolchik, D. *et al.* The UCSC Table Browser data retrieval tool. *Nucleic Acids Res.* **32**, D493-  
476 496, doi:10.1093/nar/gkh103 (2004).  
477 40 Bailey, J. A. *et al.* Recent segmental duplications in the human genome. *Science* **297**, 1003-1007,  
478 doi:10.1126/science.1072047 (2002).  
479 41 MacDonald, J. R., Ziman, R., Yuen, R. K., Feuk, L. & Scherer, S. W. The Database of Genomic  
480 Variants: a curated collection of structural variation in the human genome. *Nucleic Acids Res.* **42**, D986-  
481 992, doi:10.1093/nar/gkt958 (2014).  
482

483 Acknowledgements

484

485 We thank the participants in this study for their contribution. This study was supported by NIH  
486 U01MH108898, R01NS083823, the Simons Foundation Autism Research Initiative (SFARI) and  
487 the Howard Hughes Medical Institute (to J.G.G.). Sequencing support was provided by the Rady  
488 Children's Institute for Genomic Medicine and Oxford Nanopore. O.D. acknowledges support  
489 from the Silverman Family Foundation and Finding A Cure for Epilepsy and Seizures. M.W.B.  
490 is supported by an EMBO Long-Term Fellowship (ALTF 174-2015), which is co-funded by the  
491 Marie Curie Actions of the European Commission (LTFCOFUND2013, GA-2013-609409).

492

493 Author Contributions

494

495 M.W.B, J.G.G., and J.S. conceived the project and planned the experiments. M.W.B., M.K.,  
496 L.L.B., C.A., and A.N. performed the experiments. R.D.G. and D.A. performed the  
497 bioinformatic analysis. D.M., R.K., and E.S. performed the *de novo* analysis of the cohort  
498 collected and provided by O.D. K.N.J., O.H., J.M.-V., and M.W.B. requested, organized, and  
499 handled patient samples. M.W.B., J.G.G., and J.S. wrote the manuscript with input from R.D.G.  
500 and K.N.J. All authors have seen and commented on the manuscript prior to submission.

501

502 Author Information

503 M.W.B., K.N.J., J.S., and J.G.G. are inventors on a provisional patent (62/512,368) filed by UC,  
504 San Diego that covers the work in this manuscript. Correspondence and requests for materials  
505 should be addressed to [jogleeson@ucsd.edu](mailto:jogleeson@ucsd.edu) and [jsebat@ucsd.edu](mailto:jsebat@ucsd.edu)

506

507 Figure 1

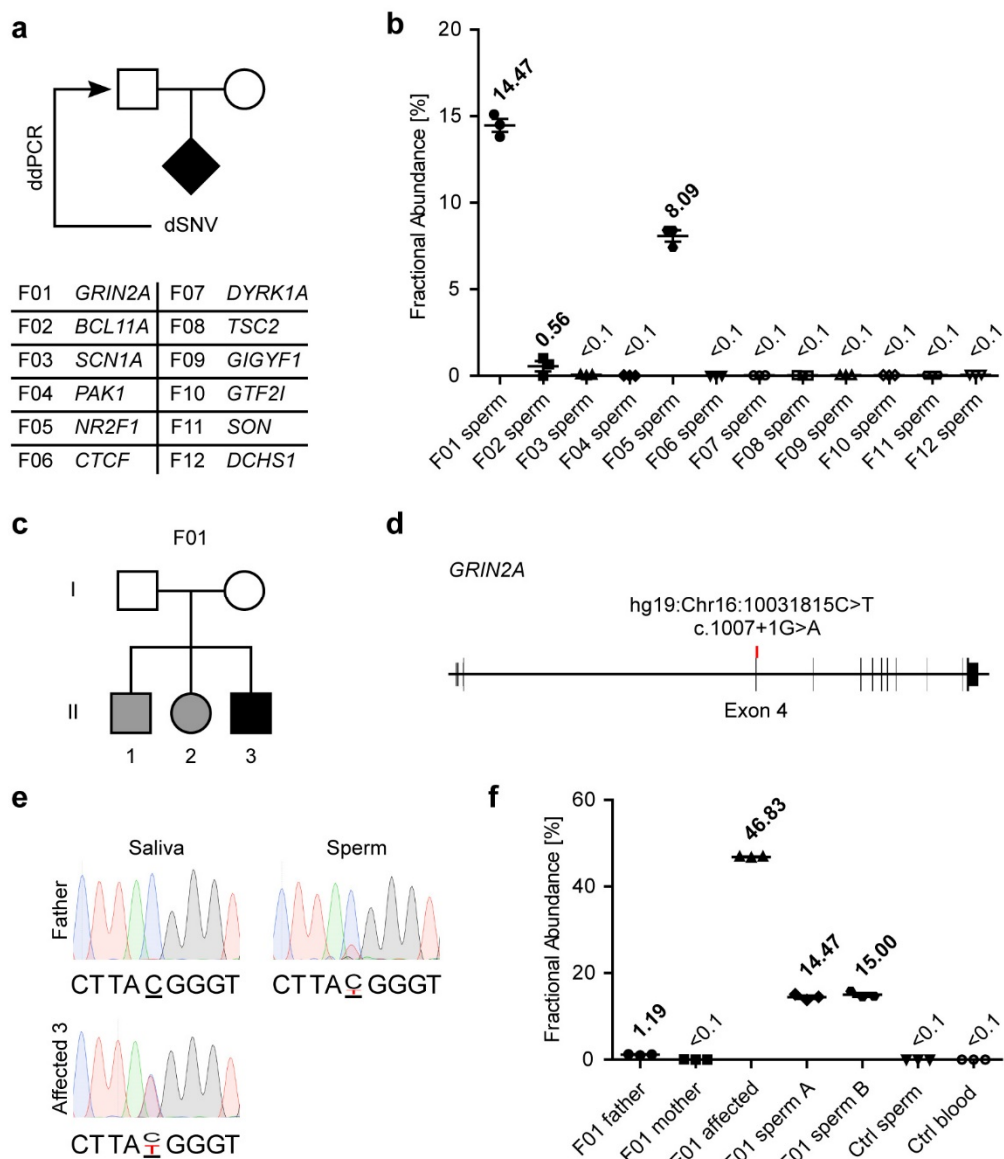

508

509 **Figure 1. Inherited, pathogenic *de novo* SNVs are detected in paternal sperm in three out of**

510 **12 ASD cases. a**, Schematic of the ASD trios that harbor *de novo* single nucleotide variants

511 (dSNVs) and a list of the interrogated genes in the 12 families. The likely pathogenic dSNVs

512 were quantified in the paternal sperm by ddPCR. **b**, Fractional abundance (determined by

513 ddPCR) of the mutant allele in paternal sperm for the relevant dSNV for the 12 families. This



514 data along with control reactions on unrelated blood and sperm is also shown in Extended Data  
515 Fig. 1 a,b. **c**, Pedigree of F01 showing the parents in generation I and three affected children in  
516 generation II. Black indicates ASD, grey, epilepsy with ADHD symptoms (see Supplementary  
517 Table 2). Note that only II-3 met the criteria for *bona fide* ASD and was the only child included  
518 in the original trio-based study. **d**, Schematic of *GRIN2A* and the mutation that was found in all  
519 three children and affected a splice site. **e**, Sanger sequencing results showing the C>T  
520 conversion described in **d**. The affected child was heterozygous for the mutation and paternal  
521 sperm showed a minor peak of the mutant allele consistent with the ddPCR results. **f**, Fractional  
522 abundance plot as in **b** for the *GRIN2A* mutation in the F01 family. Father, mother, and affected  
523 indicate saliva samples of the respective individual, whereas sperm A and B indicate biological  
524 replicates of the paternal sperm. Ctrl –an unrelated sperm or blood sample, as indicated, used as  
525 control. Plots in **b** and **f** show the individual data points (technical triplicates), as well as the  
526 mean  $\pm$  SEM.  
527

528 Figure 2

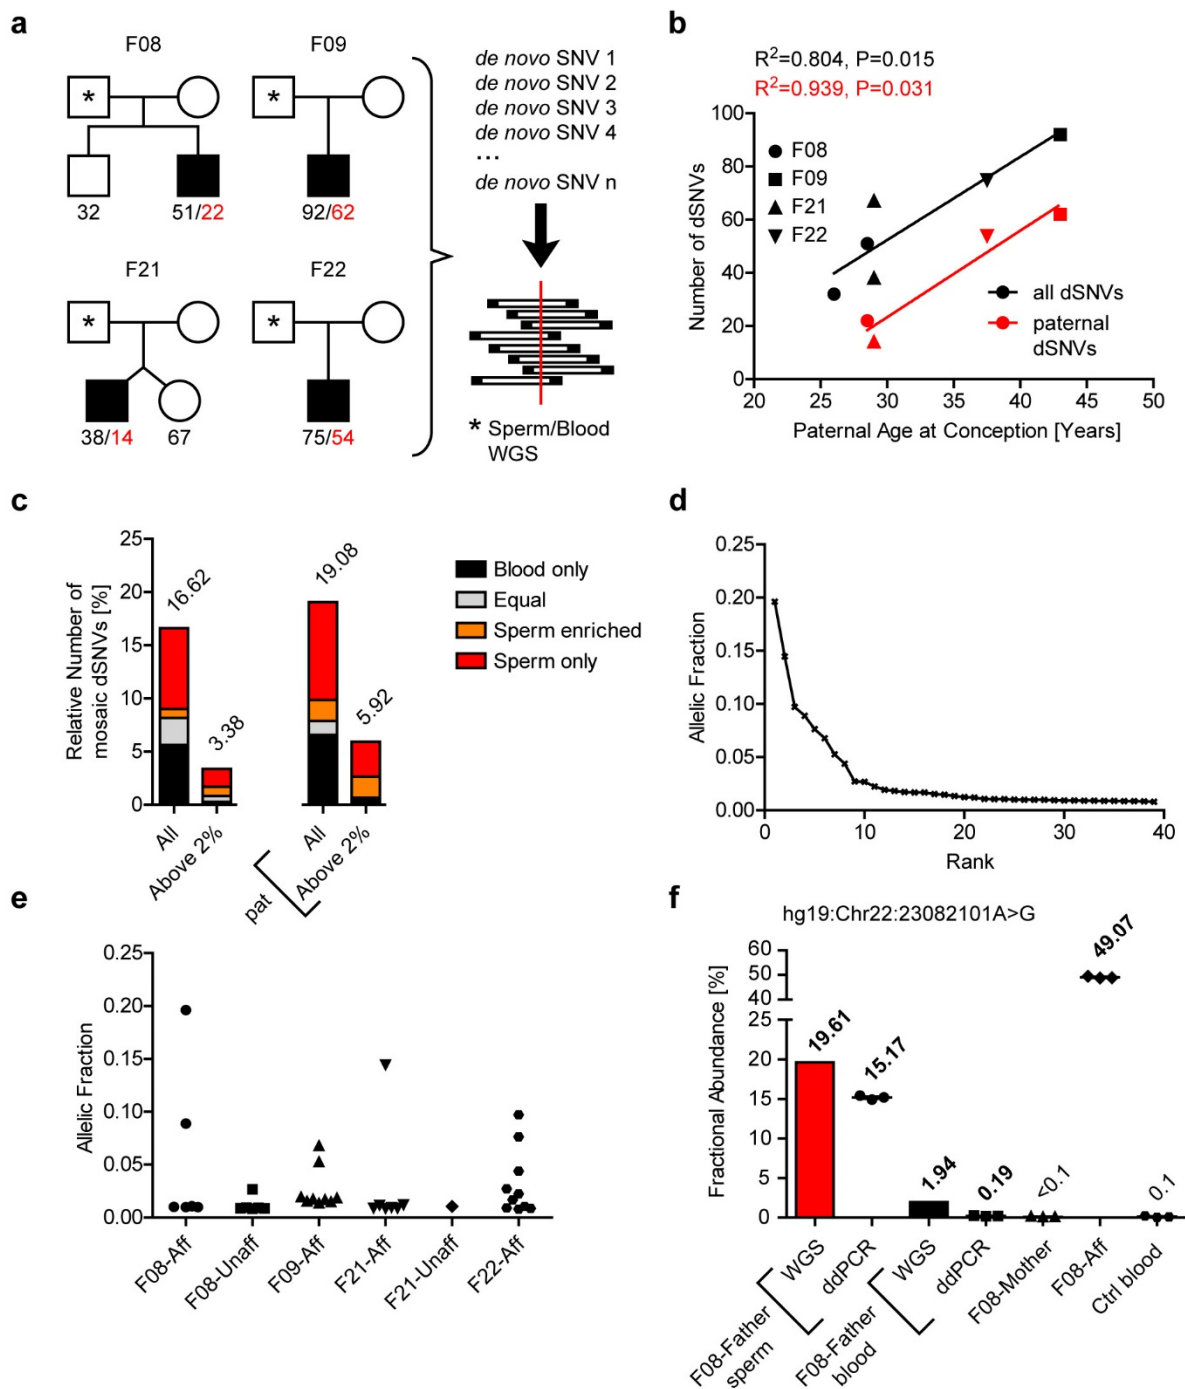

529

530 **Figure 2. Frequencies and allelic fractions of dSNVs in paternal sperm.** a, Schematic  
531 showing all four pedigrees for F08, F09, F21, and F22 and the number of detected dSNVs for

532 each child. Black numbers indicate all dSNVs that were detected in a given individual, whereas  
533 red numbers indicate the subset of variants from the affected that were phased to the paternal  
534 haplotype using Oxford Nanopore long-read (average read length: 6,772 bp) technology. The  
535 right side depicts the basic strategy: detected dSNVs were assessed in the respective father's  
536 sperm and blood using WGS data. **b**, Plot showing the increase in dSNV number with paternal  
537 age at conception, as expected<sup>9,11</sup>. Line shows a regression curve demonstrating this dependence  
538 (all dSNVs:  $R^2=0.804$ ,  $P=0.015$ ; paternal dSNVs:  $R^2=0.939$ ,  $P=0.031$ ). Red font indicates data  
539 for those dSNVs that were phased to the paternal haplotype. **c**, Quantification of the relative  
540 number of dSNVs that showed evidence of mosaicism in blood, sperm, or both. Equal denotes  
541 variants that were detected at roughly equal ratios in both data sets ( $\alpha < 3$ ). All: relative numbers  
542 of dSNVs at all AF; Above 2%: relative numbers of dSNVs at  $AF > 2\%$ ; pat: data from paternally  
543 phased dSNVs only. The results show that most variants above 2% were either found only in  
544 sperm or were enriched in sperm **d**, Plot of all mosaic variants detected in sperm versus  
545 respective allelic fraction (AF). **e**, Same data set as in **d**, but separated by which child harbored  
546 the dSNV. **f**, Fractional abundance (determined by ddPCR or WGS read counts) of the mutant  
547 allele Chr22:23082101A>G in family F08. Mother and Aff depict blood samples from the  
548 mother and the affected child that harbored this mutation. Graph shows individual data points  
549 (technical triplicates) and mean  $\pm$  SEM for the ddPCR data.  
550

551 Figure 3

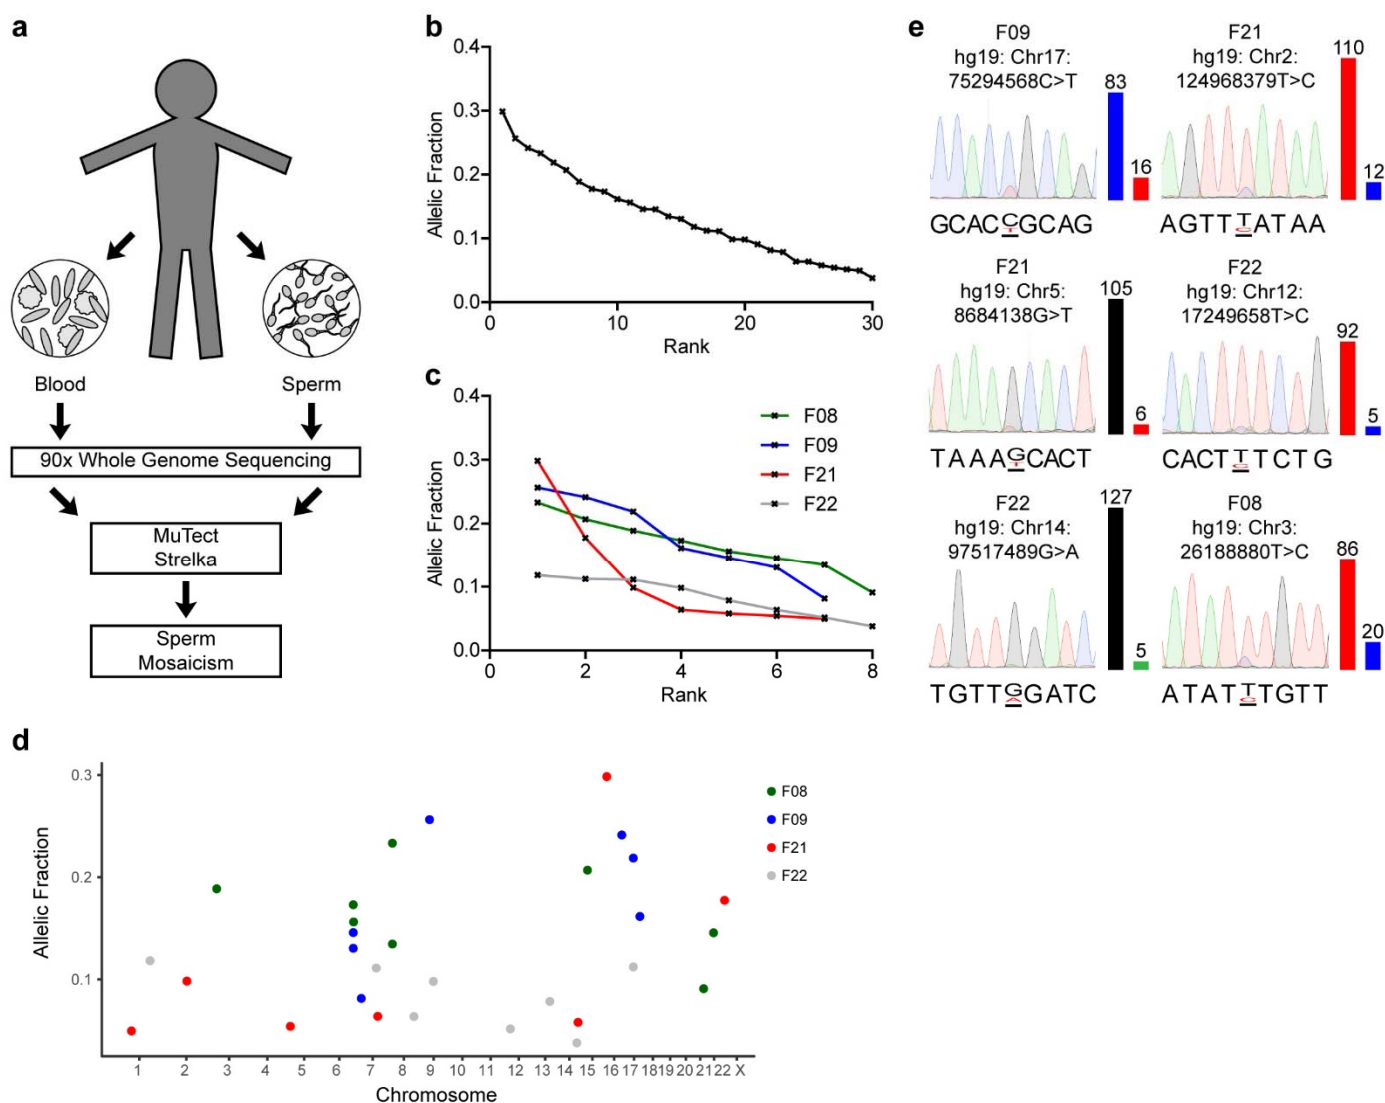

552

553 **Figure 3. Unbiased detection of mosaic variants in sperm.** **a**, Schematic illustrating the

554 workflow for the analysis of mosaicism in sperm. **b**, Plot of all mosaic variants detected in sperm

555 and respective AF. **c**, Same data set as in **b**, but separated by family. **d**, Plot of all mosaic

556 variants showing roughly equal distribution across the genome. **e**, Sanger sequencing results for

557 six of the detected mosaic variants, with relative peak height representing degree of mosaicism.

558 Beside the chromatograms, bars depict read counts in the WGS data for the reference allele on

559 the left and the mutant allele on the right and are colored according to the base they represent (A:  
560 green, T: red, G: black, C: blue).  
561

562 Figure 4

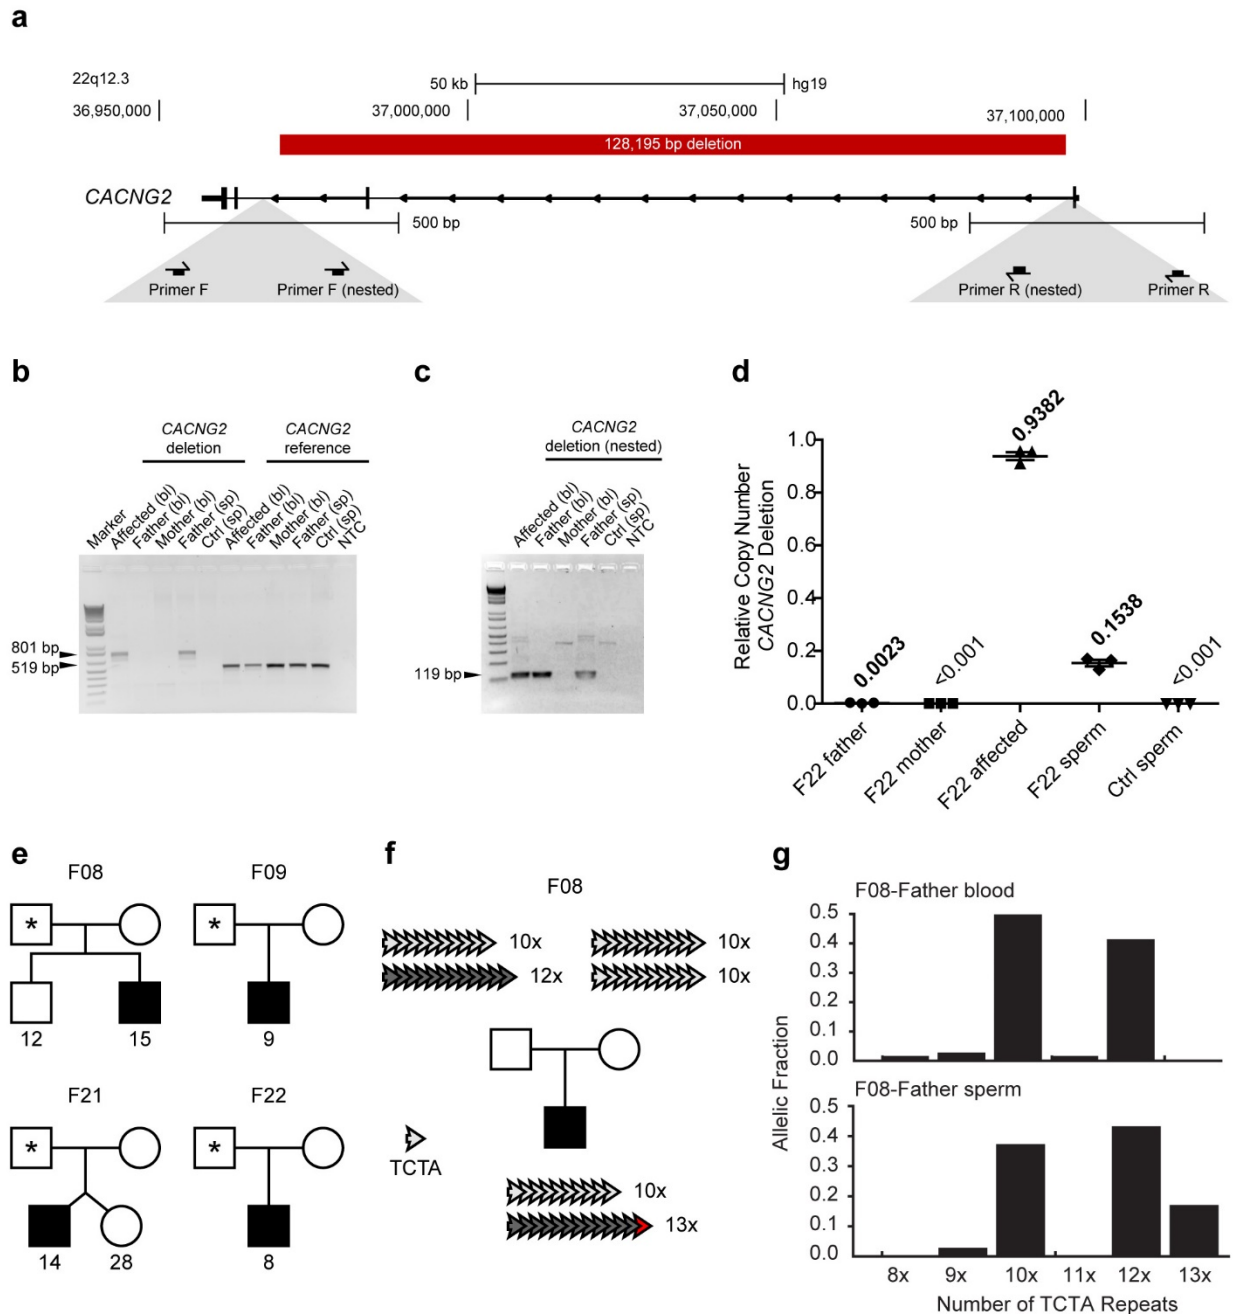

563

564 **Figure 4. Germline mosaicism extends to structural variants.** a, Schematic depicting part of

565 the genomic locus of *CACNG2* and the pathogenic 128,195 bp deletion found in family F22.

566 Below: primers used for the nested PCR to detect the deletion. b, Agarose gel resolving the

567 primary PCR products from the indicated individuals from blood (bl) and sperm (sp). *CACNG2*  
568 deletion: PCR spanning the deletion locus to amplify an 801 bp band if deletion is present.  
569 *CACNG2* reference: PCR within the deleted locus to amplify a 519 bp band. The deletion-  
570 specific band was detected in the child's blood and the father's sperm sample. **c**, Agarose gel  
571 resolving the nested PCR products arranged as in **b**. Note that this strategy also showed positive  
572 signal for the paternal blood. Together with **b**, this suggested that the deletion allele is present at  
573 low AF in the paternal blood and at considerably higher levels in the paternal sperm. **d**, Copy  
574 number quantification of the *CACNG2* deletion by ddPCR. Samples from father, mother, and  
575 child were derived from blood (and sperm in the case of the father). The deletion allele was  
576 present at a copy number of 0.1538 in paternal sperm, which consequently means that it was  
577 present at an AF of ~7.5%. **e**, Schematic showing all four pedigrees for F08, F09, F21, and F22  
578 and the number of detected *de novo* short tandem repeat variants (dSTR $\Delta$ s) for each child. **f**,  
579 Schematic showing an example of a dSTR $\Delta$  in F08, where the child had an expansion of a  
580 tetranucleotide repeat (TCTA) on the paternal haplotype (12x to 13x). **g**, Detailed analysis of the  
581 TCTA repeat numbers in paternal blood and sperm reveals a sperm-specific mosaicism of the  
582 13x repeat at an AF of ~17.5%.  
583

584 Extended Data Figure 1

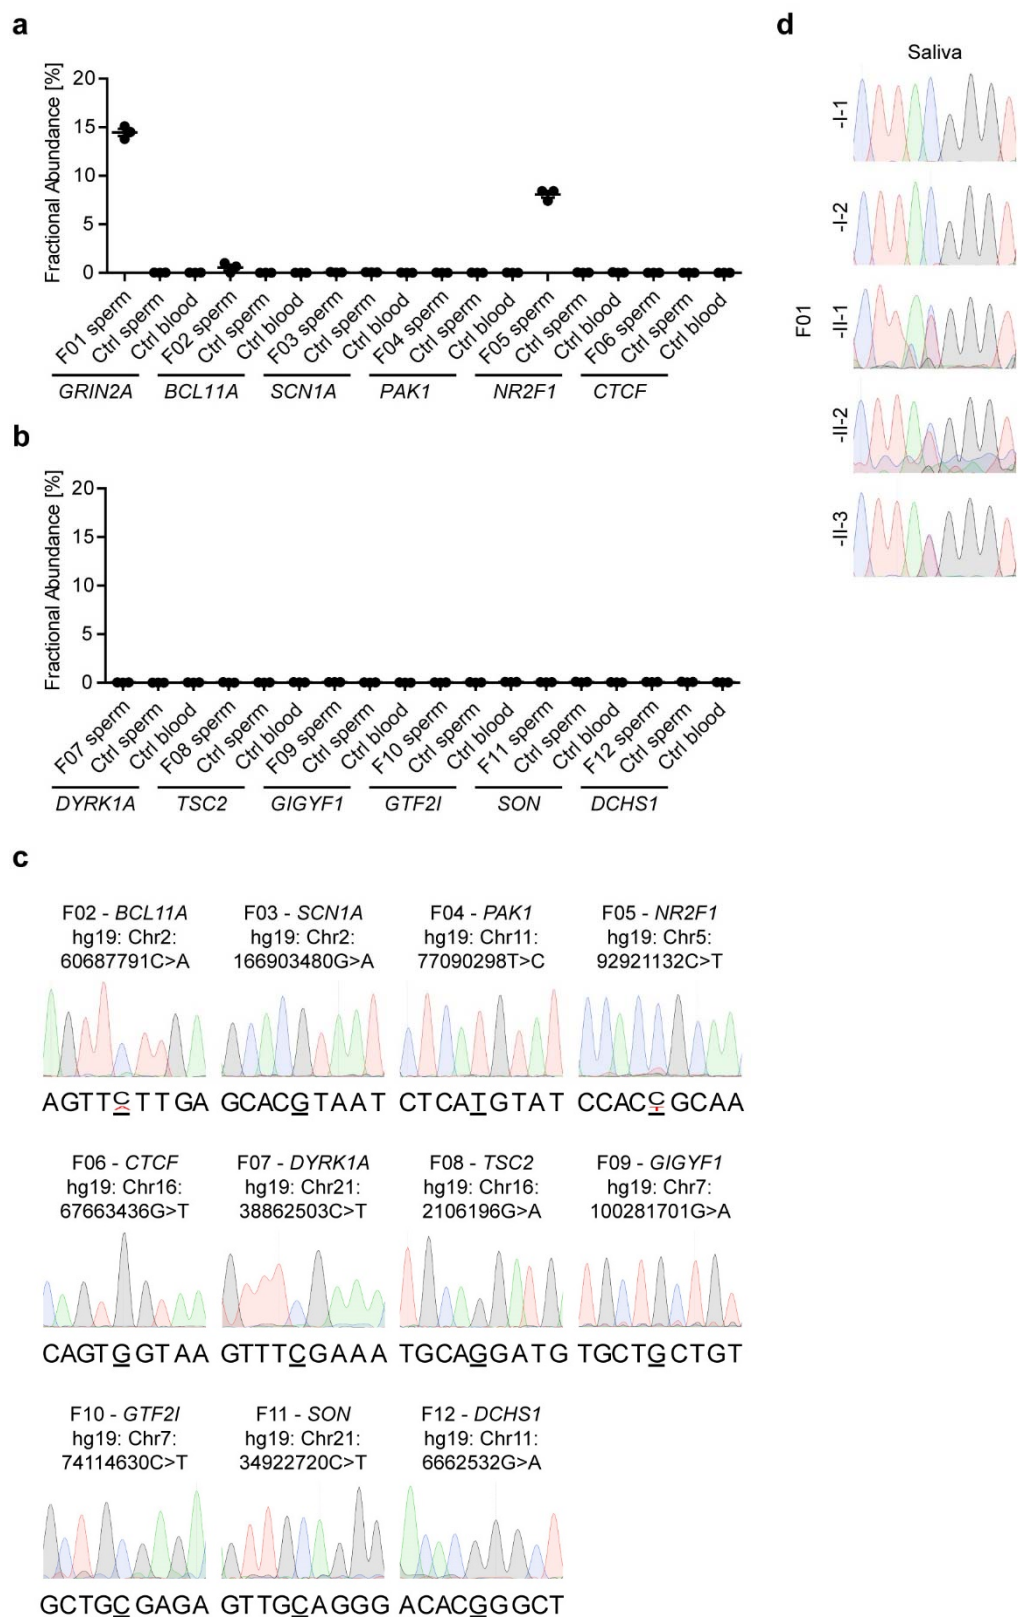



585

586 **Extended Data Figure 1. Detection of paternal germline mosaicism in 3 out of 12 ASD**

587 **families. a,b**, Fractional abundance (determined by ddPCR) of the mutant allele in paternal

588 sperm for the relevant dSNV in the 12 families. Ctrl –an unrelated sperm or blood sample, as

589 indicated, acting as control. Graphs show individual data points (technical triplicates) and mean

590  $\pm$  SEM. **c**, Sanger sequencing results showing the locus harboring the dSNV for each family.

591 Confirming the ddPCR results, F02 and F05 showed mosaicism at their respective positions. **d**,

592 Sanger sequencing results showing the C>T conversion locus in *GRIN2A* in F01 for all family

593 members. The mutation was absent in the saliva of both parents, but present as a heterozygous

594 allele in all 3 children. Parts of this panel are shown in Fig. 1e.

595

596 Extended Data Figure 2

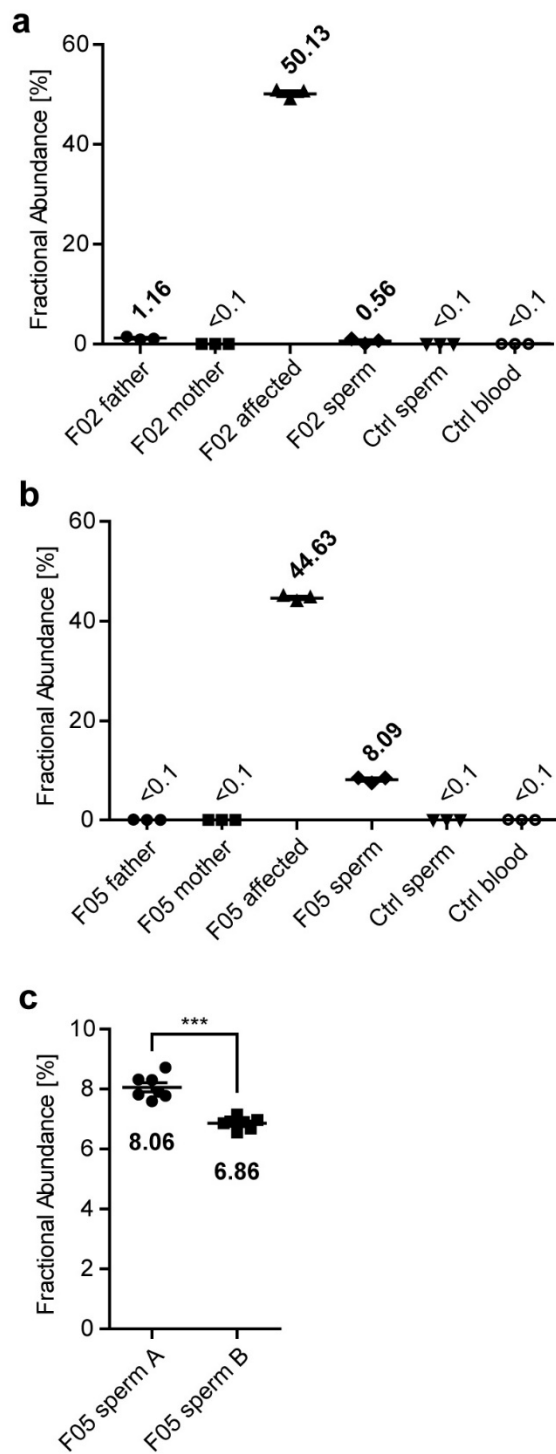

597

598 **Extended Data Figure 2. Extended ddPCR results for the mosaic variants in F02 and F05.**

599 **a**, Fractional abundance (determined by ddPCR) of the mutant *BCL11A* allele in F02. While the

600 variant was absent from the saliva sample from mother, as well as the blood and sperm control  
601 (ctrl) samples, it was present at low levels in the father's saliva and sperm. This variant was  
602 detected as mosaic at similar levels in both tissues, although the very low sperm yield obtained  
603 may have influenced the results. **b**, as in **a**, but for F05. Mosaicism could only be detected in the  
604 paternal sperm, but not the blood sample. **c**, Fractional abundance (determined by ddPCR)  
605 comparing two biological replicates of paternal sperm from F05. Sperm sample A (used for  
606 ddPCR analysis in Fig. 1, Extended Data Fig. 1, and Extended Data Fig. 2b) was significantly  
607 different from sample B, suggesting variation of mosaicism over time. \*\*\* $P < 0.001$  (unpaired t-  
608 test, two-tailed). Graphs in **a-c** show individual data points (technical triplicates in **a,b** and seven  
609 technical replicates in **c**) and mean  $\pm$  SEM.

610

611 Extended Data Figure 3

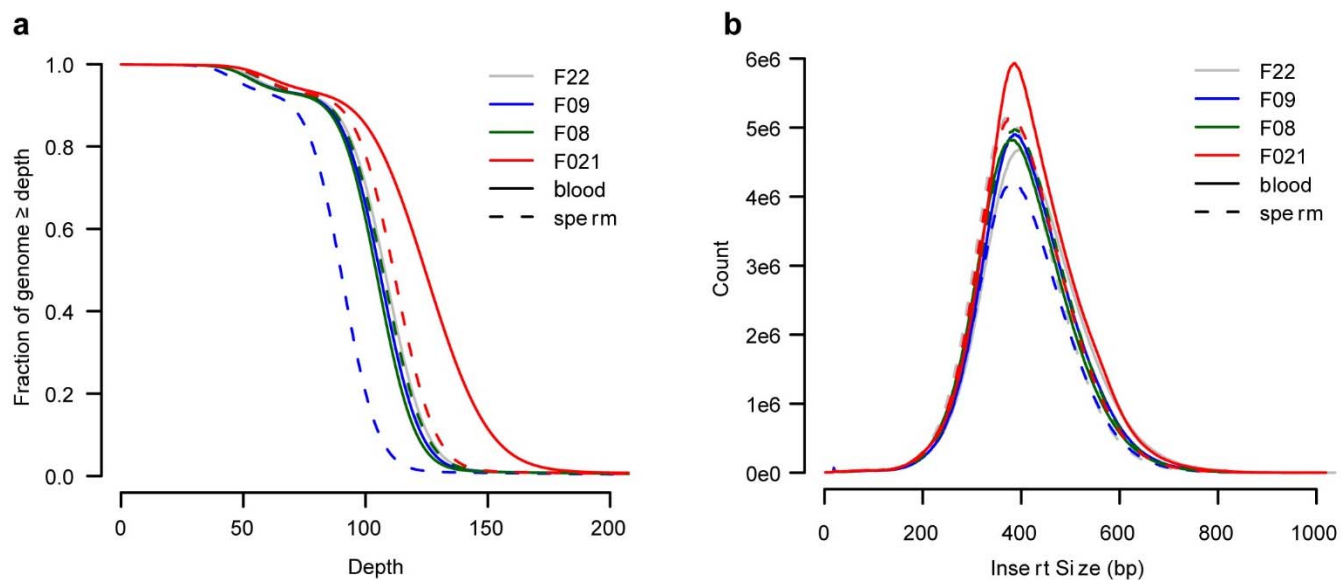

612

613 **Extended Data Figure 3. Whole genome sequencing metrics. a,** Plot showing the read depth

614 for the blood and sperm samples from the fathers of F08, F09, F21, and F22. **b,** Plot showing the

615 insert size distribution for the same data sets as in **a**.

616

617 Extended Data Figure 4

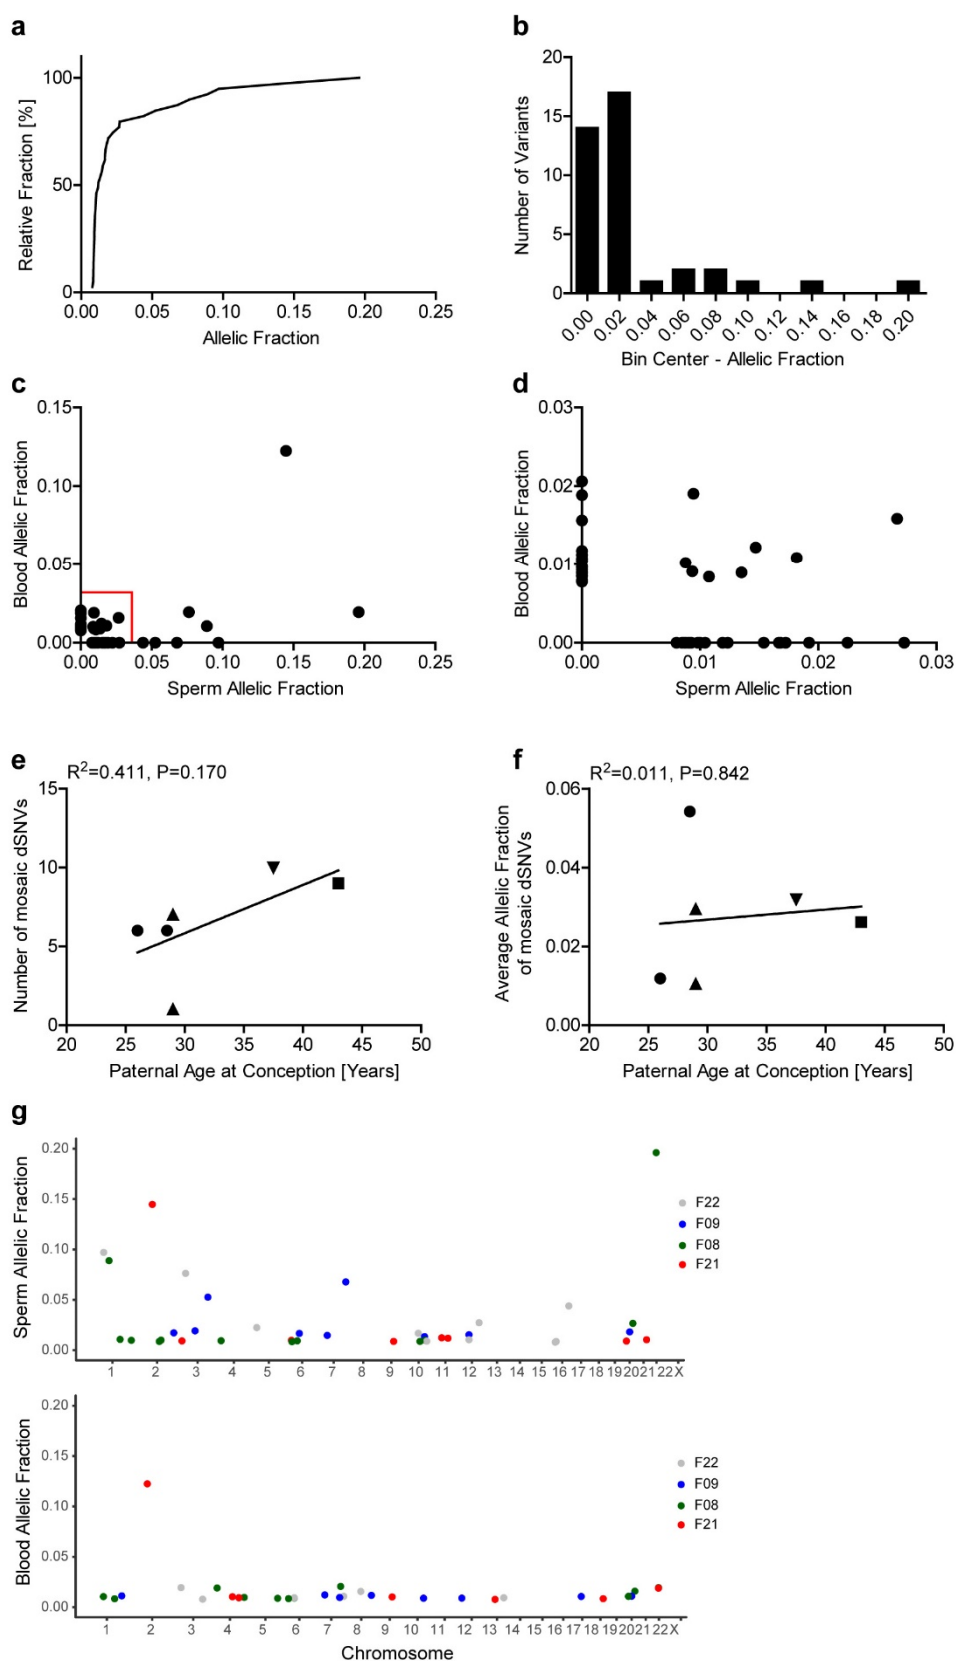

618

619 **Extended Data Figure 4. Supplementary graphs for the mosaicism analysis of dSNVs. a,**

620 Plot showing the cumulative relative fraction of mosaic dSNVs in sperm. **b,** Frequency

621 distribution plot for same data as in **a. c,d,** Plot showing the AF in sperm and blood for all

622 mosaic dSNVs. **d** is a magnification of the red box in **c. e,** Plot showing the number of mosaic

623 dSNVs present at the paternal age at conception. Line shows a regression curve suggesting a

624 positive correlation that is non-significant ( $R^2=0.411$ ,  $P=0.170$ ). **f,** Plot showing the average AF

625 of mosaic dSNVs relative to the paternal age at conception. Line shows a regression curve

626 without positive correlation ( $R^2=0.011$ ,  $P=0.842$ ). **g,** Plot of all mosaic variants denoting their

627 positions on the chromosomes for sperm and blood.

628

629 Extended Data Figure 5

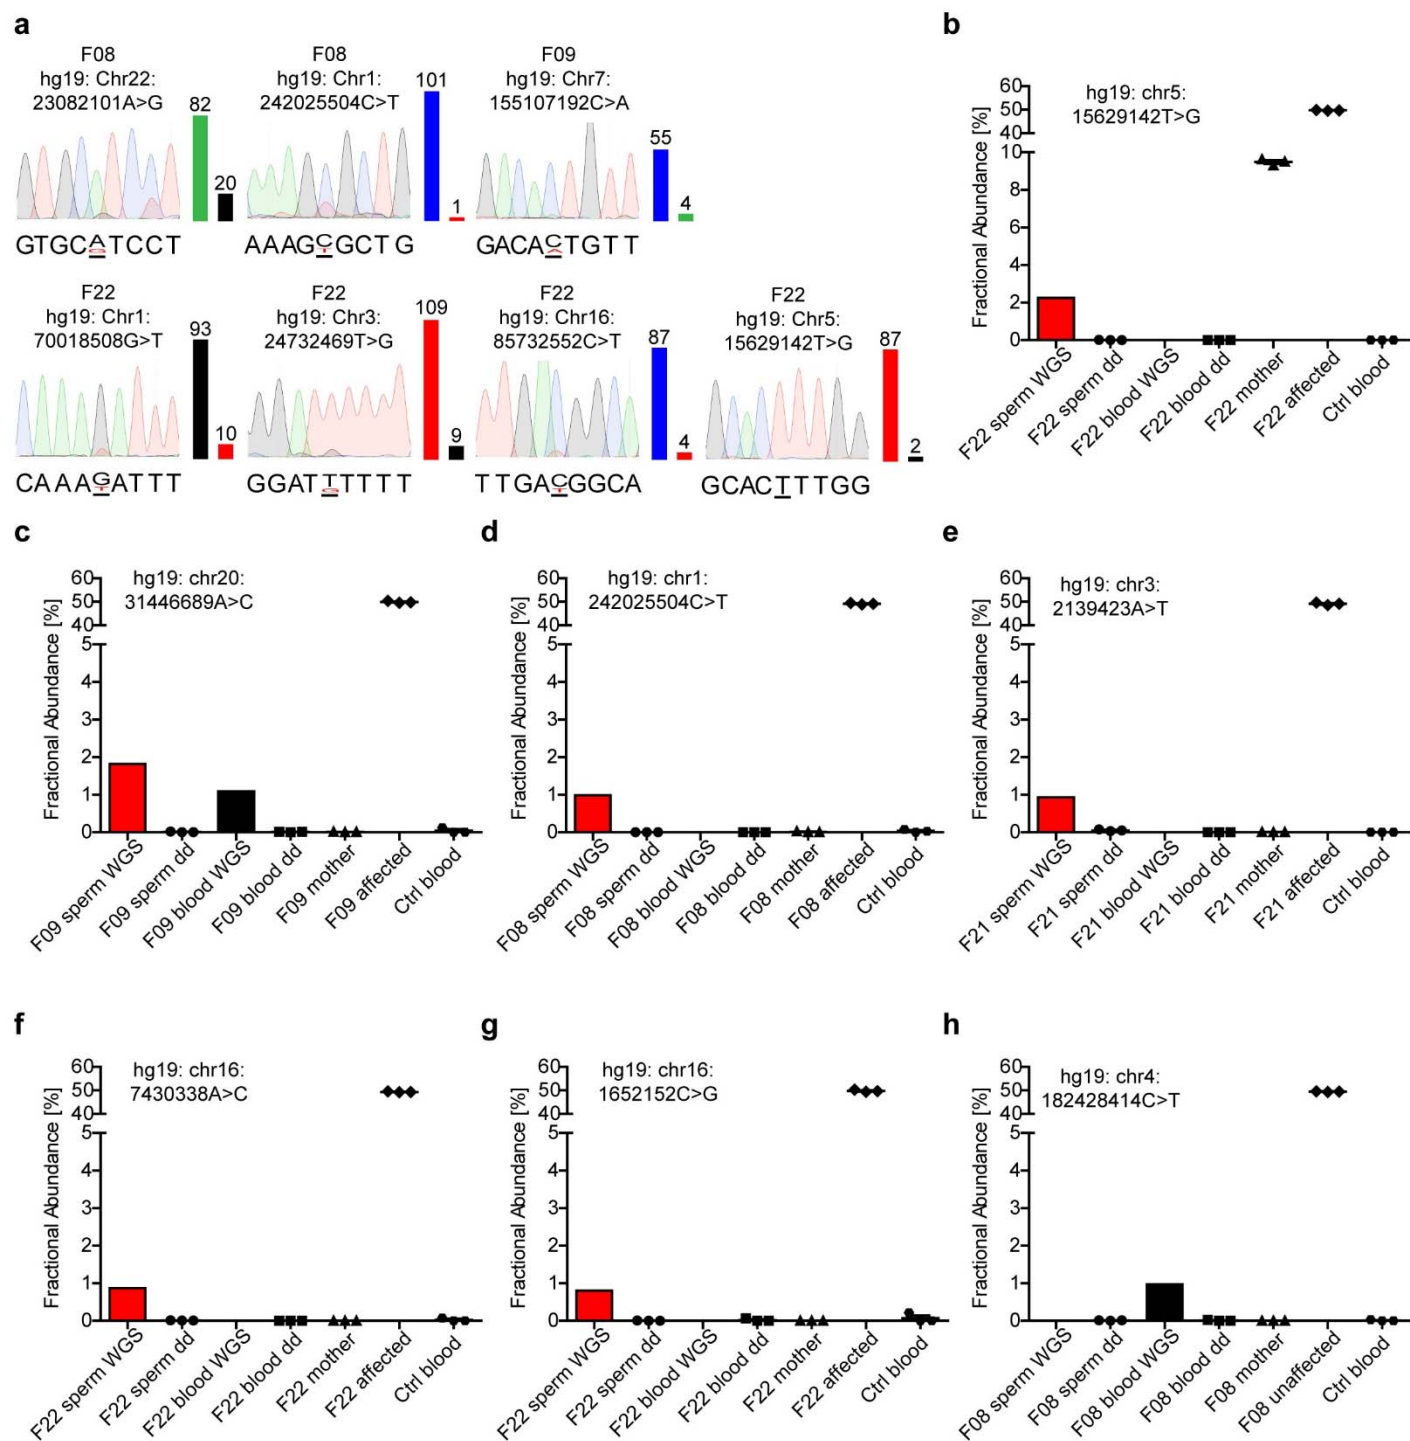

630

631 **Extended Data Figure 5. Orthogonal confirmation experiments of mosaic dSNVs. a**, Sanger

632 sequencing results for seven of the detected mosaic variants, showing mosaicism in six cases.

633 Numbers and bars beside the chromatograms depict read counts in the WGS data for the  
634 reference allele on the left and the mutant allele on the right. Variant F08:hg19:  
635 Chr1:242025504C>T showed suspiciously high mosaic levels in the chromatogram compared to  
636 the WGS results. **b-h**, Fractional abundance (determined by ddPCR or WGS read counts) of the  
637 indicated mutant alleles. Mother and (un)affected indicate blood samples from the mother and  
638 the child that harbored this mutation. Note that none of the low mosaic variants showed  
639 mosaicism in paternal sperm. Variant F22: chr5:15629142T>G depicted in **b** exhibited  
640 mosaicism at ~10% in the mother, consistent with its phasing to the maternal haplotype  
641 (Supplementary Table 3). Variant F08:hg19: Chr1:242025504C>T (depicted in **d**) was also  
642 interrogated in **a** and showed the surprisingly high levels of mosaicism. These data suggested  
643 that the Sanger sequencing result was a false positive, probably caused by repetitive sequences.  
644 Taken together, orthogonal quantification by ddPCR suggested that low level variants are highly  
645 unreliable as we could not confirm them with orthogonal methods. Graph shows individual data  
646 points (technical triplicates) and mean  $\pm$  SEM for the ddPCR data.  
647



648 Extended Data Figure 6

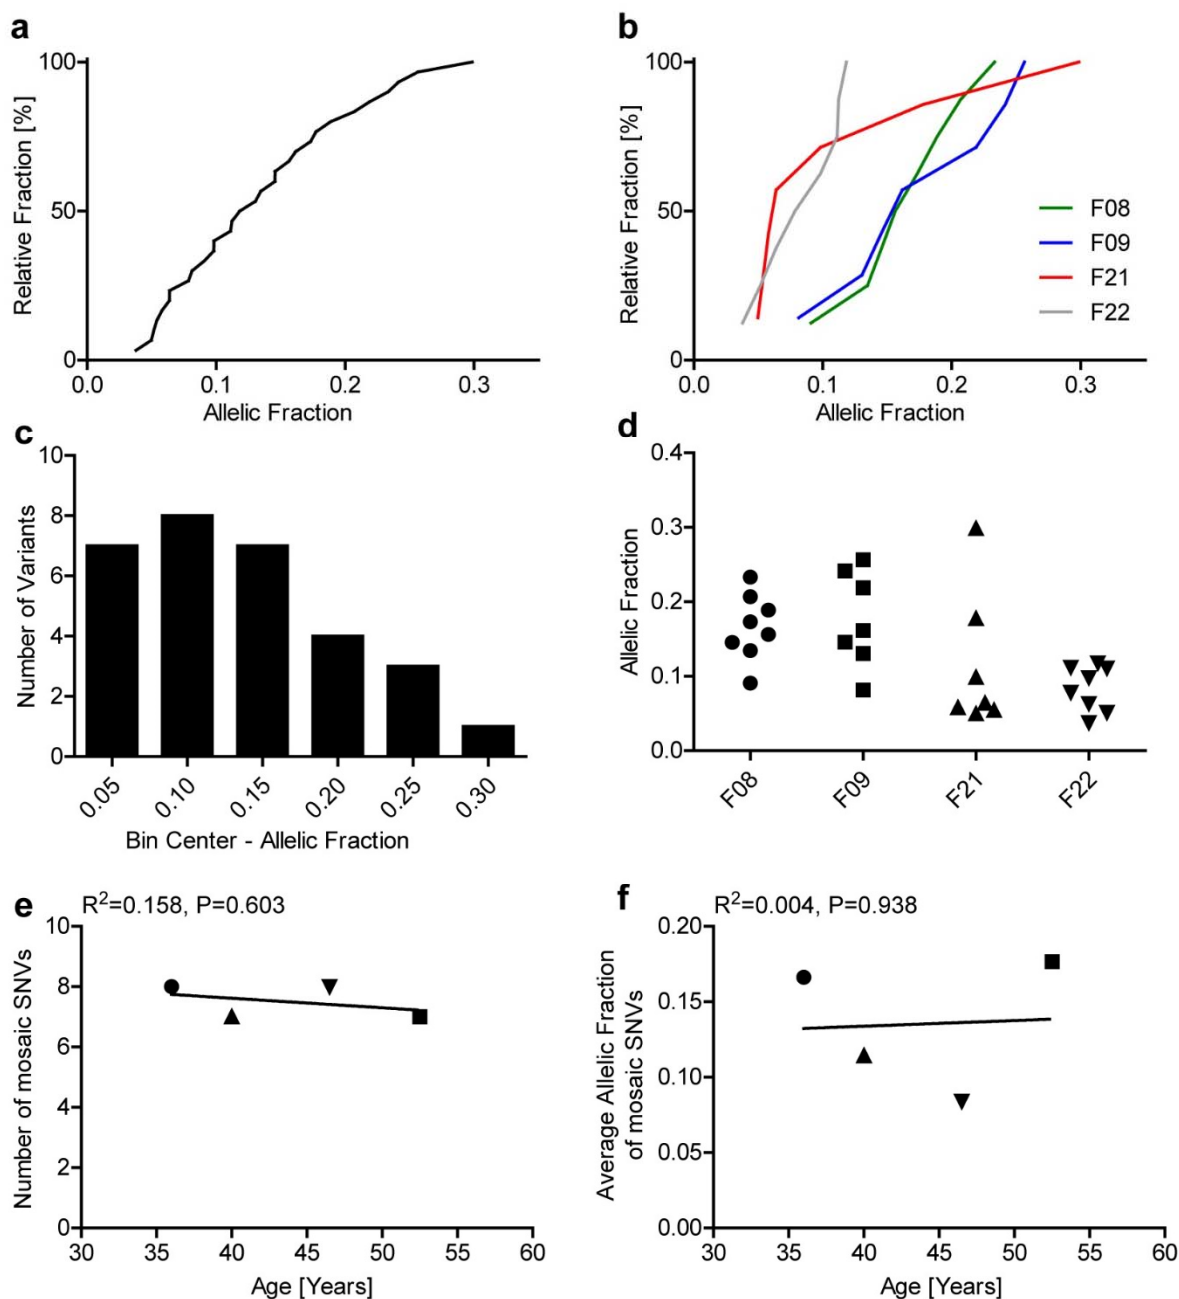

649

650 **Extended Data Figure 6. Supplementary graphs for the mosaicism analysis of SNVs by**

651 **MuTect and Strelka. a,** Plot showing the cumulative relative fraction of mosaic SNVs detected

652 **in sperm employing our MuTect/Strelka pipeline. b,** As in **a,** but separated by origin of the

653 variants. **c**, Frequency distribution plot for same data as in **a**. **d**, As in **b**, but showing the AF  
654 distribution per sample. **e**, Plot showing the number of mosaic SNVs relative to the paternal age  
655 at sample collection. Line shows a regression curve without correlation ( $R^2=0.158$ ,  $P=0.603$ ). **f**,  
656 Plot showing the average AF of mosaic SNVs relative to the paternal age at sample collection.  
657 Line shows a regression curve without correlation ( $R^2=0.004$ ,  $P=0.938$ ).  
658

659 Extended Data Figure 7

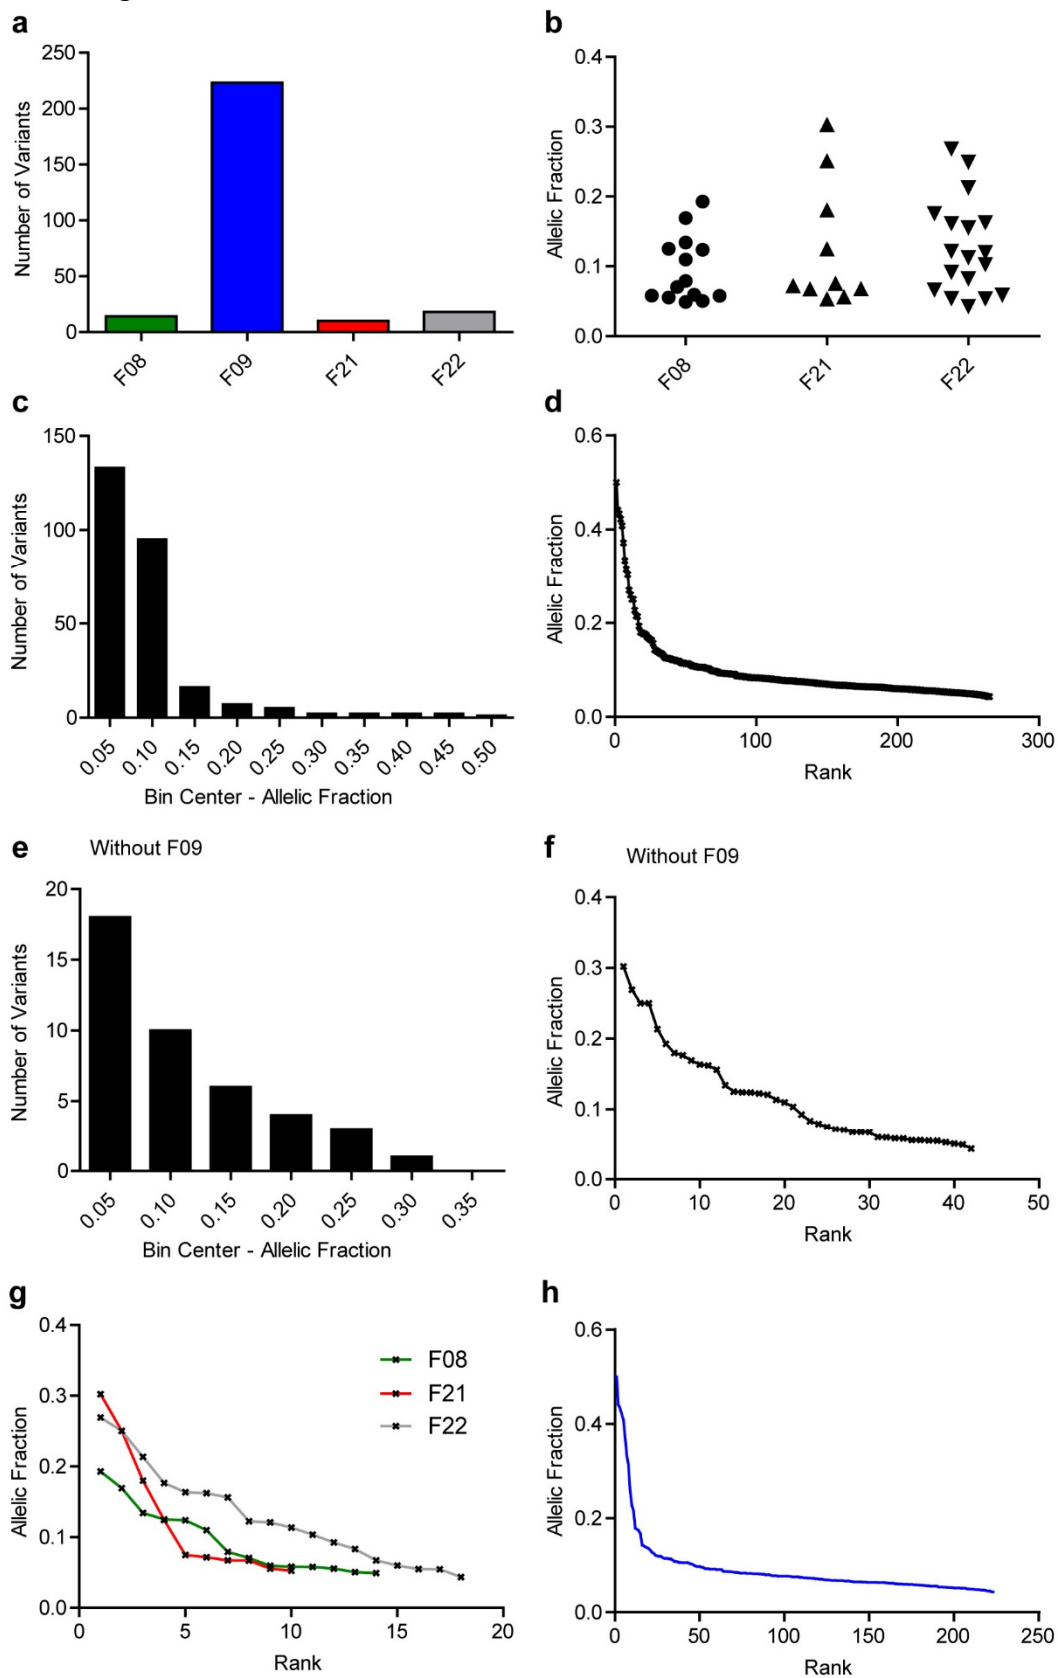

660

661 **Extended Data Figure 7. Unbiased analysis of mosaic variants in blood. a**, Plot showing the  
662 number of variants detected per sample. F09 showed an aberrantly high number of variants  
663 relative to the other individuals. **b**, Plot showing the AF distribution per sample (without F09). **c**,  
664 Frequency distribution of all mosaic SNVs found in blood. **d**, Plot showing all mosaic SNVs  
665 found in blood and their AF. **e,f**, Same as **c,d**, but without F09. **g,h**, Plot showing the mosaic  
666 SNVs found in blood and their AF by origin for F08, F21, and F22 (**g**), as well as F09 (**h**).

667

668 Extended Data Figure 8

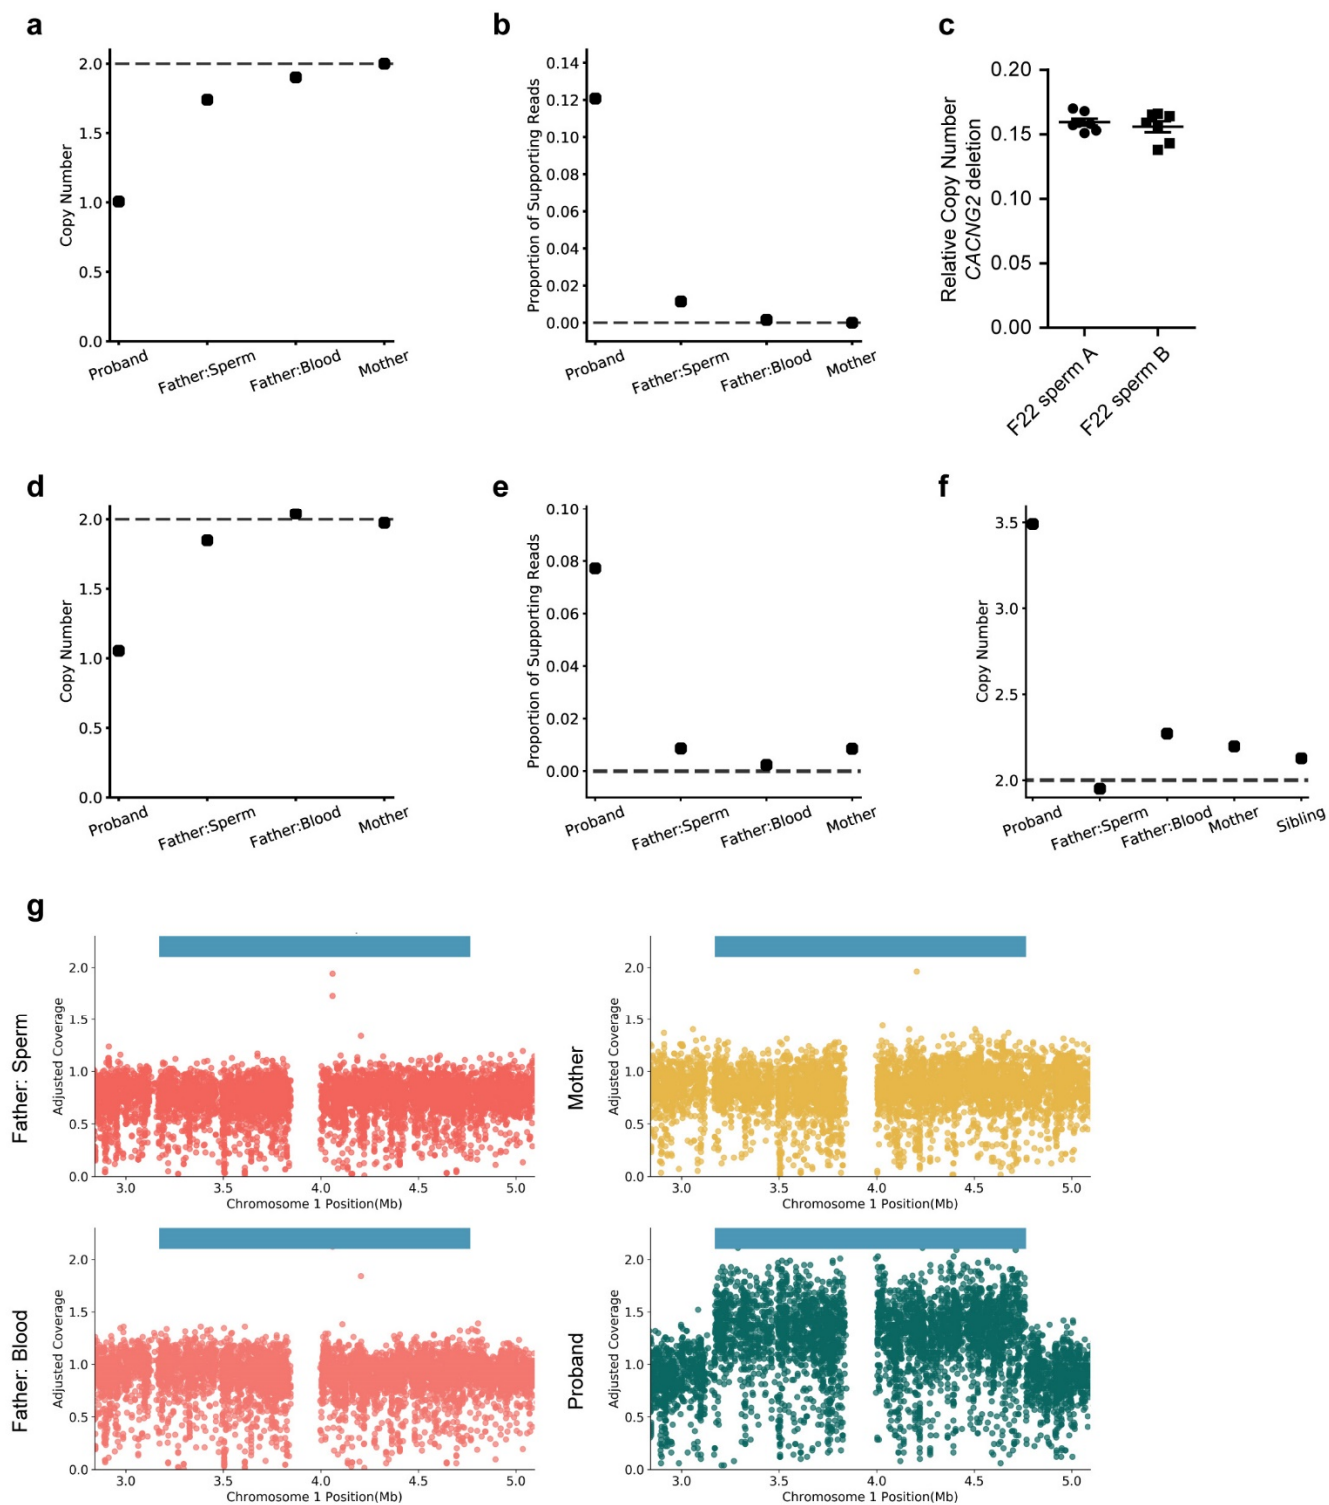

669

670 **Extended Data Figure 8. Structural variant detection in the WGS data sets for F21 and**  
671 **F22. a**, Copy number analysis of the region deleted in the structural variant (SV) depicted in Fig.  
672 4a. Both the father's sperm and blood showed a reduction relative to the mother. **b**, Supporting  
673 split read data for the same deletion further supported mosaicism in sperm. **c**, Copy number  
674 quantification of the *CACNG2* deletion by ddPCR. Two biological replicate sperm samples from  
675 the father of F22 were compared to each other. Sperm sample A was the one used for the  
676 analysis shown in Fig. 4b-d and >90x WGS. There was no significant difference between the two  
677 samples (unpaired t-test, two-tailed). **d,e**, same data as in **a** and **b** for a separate, non-pathogenic  
678 deletion found in F22. Although copy number did support mosaicism in the paternal sperm, split  
679 read evidence did not, as all the positive reads in the paternal sperm and the mother were faulty  
680 alignments (data not shown). Together, these data suggest that this deletion is not mosaic in  
681 sperm. **f,g**, Copy number analysis of a 1.6 Mb duplication on chromosome 1 in F21 that is likely  
682 pathogenic. Overall copy number (**f**) and detailed locus analysis (**g**) both suggest that this variant  
683 is not mosaic in paternal sperm.  
684

685 Extended Data Figure 9

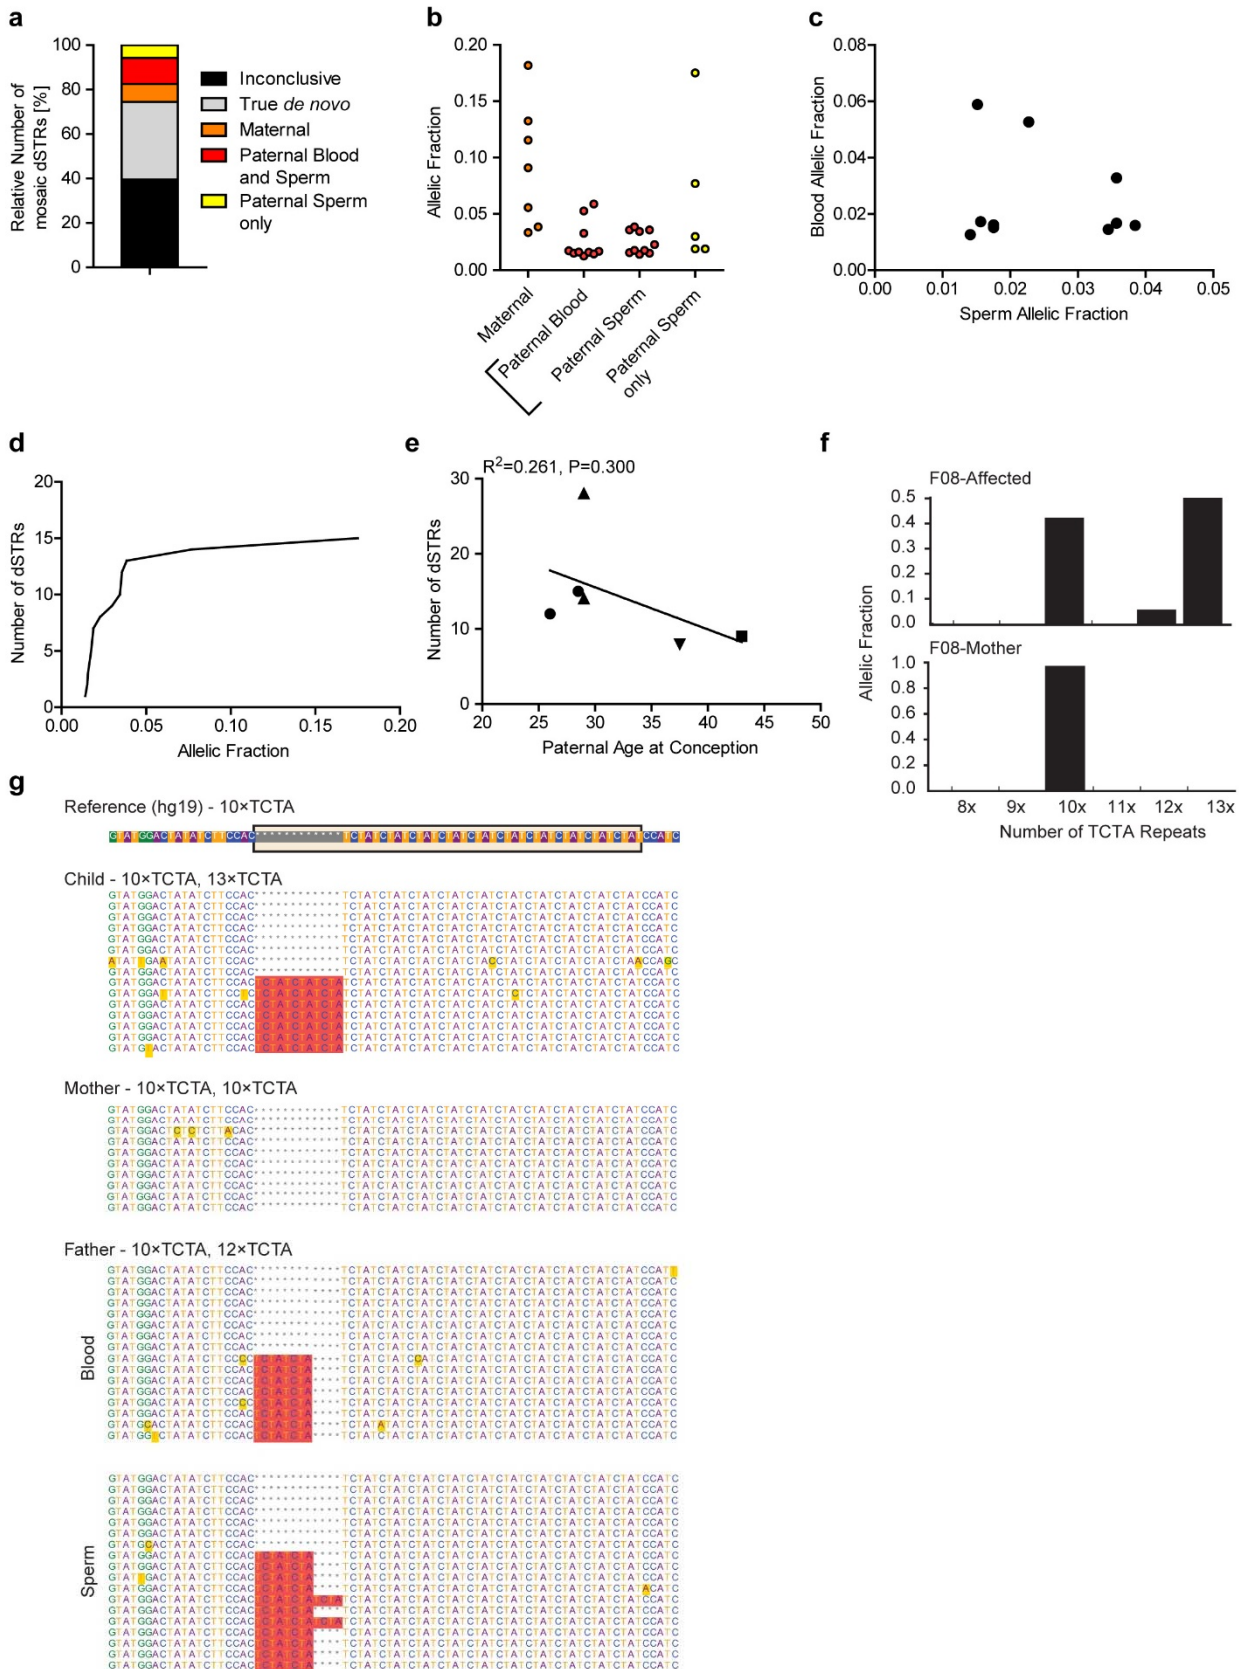

686

687 **Extended Data Figure 9. Supplementary graphs for mosaicism detection of dSTRΔs.** **a**, Plot

688 showing the relative number of *de novo* short tandem repeat variants (dSTRΔs), whose mosaic

689 status was inconclusive, that were presumed true *de novo* (no evidence outside the child), or

690 mosaic in the mother, the father's blood and sperm, or the fathers's sperm only. **b**, Plot of the AF

691 of dSTRΔs that were also found in the mother, the father's blood and sperm, or the father's

692 sperm only. **c**, Plot showing the blood and sperm allelic frequencies for those dSTRΔs that were

693 detected in the father. **d**, Plot showing the cumulative relative fraction of mosaic dSTRΔs. **e**, Plot

694 showing the number of mosaic dSTRΔs relative to the paternal age at conception. Line shows a

695 regression curve without positive correlation ( $R^2=0.261$ ,  $P=0.300$ ). Note that this is in

696 disagreement with previous results that showed positive correlation of dSTRΔs. It is most likely

697 a result of the small sample size and stringent requirements for a dSTRΔ to be considered a *de*

698 *novo* mutation in our data set. **f**, Detailed analysis of the TCTA repeat numbers in the affected's

699 and maternal blood. **g**, Sample reads showing the presence of a 10x and 13x allele in the child, a

700 homozygous 10x allele in the mother, a 10x and a 12x allele in the father, and the presence of a

701 mosaic 13x allele exclusively in paternal sperm.

702
